# Supplementary figures and images for: Efficacy and Safety of Afatinib in the Treatment of Advanced Non-Small-Cell Lung Cancer with EGFR Mutations: A Meta-Analysis of Real-World Evidence
Source: Hindawi journal article supplement (doi:10.1155/2021/8736288), 2021-12-18

A

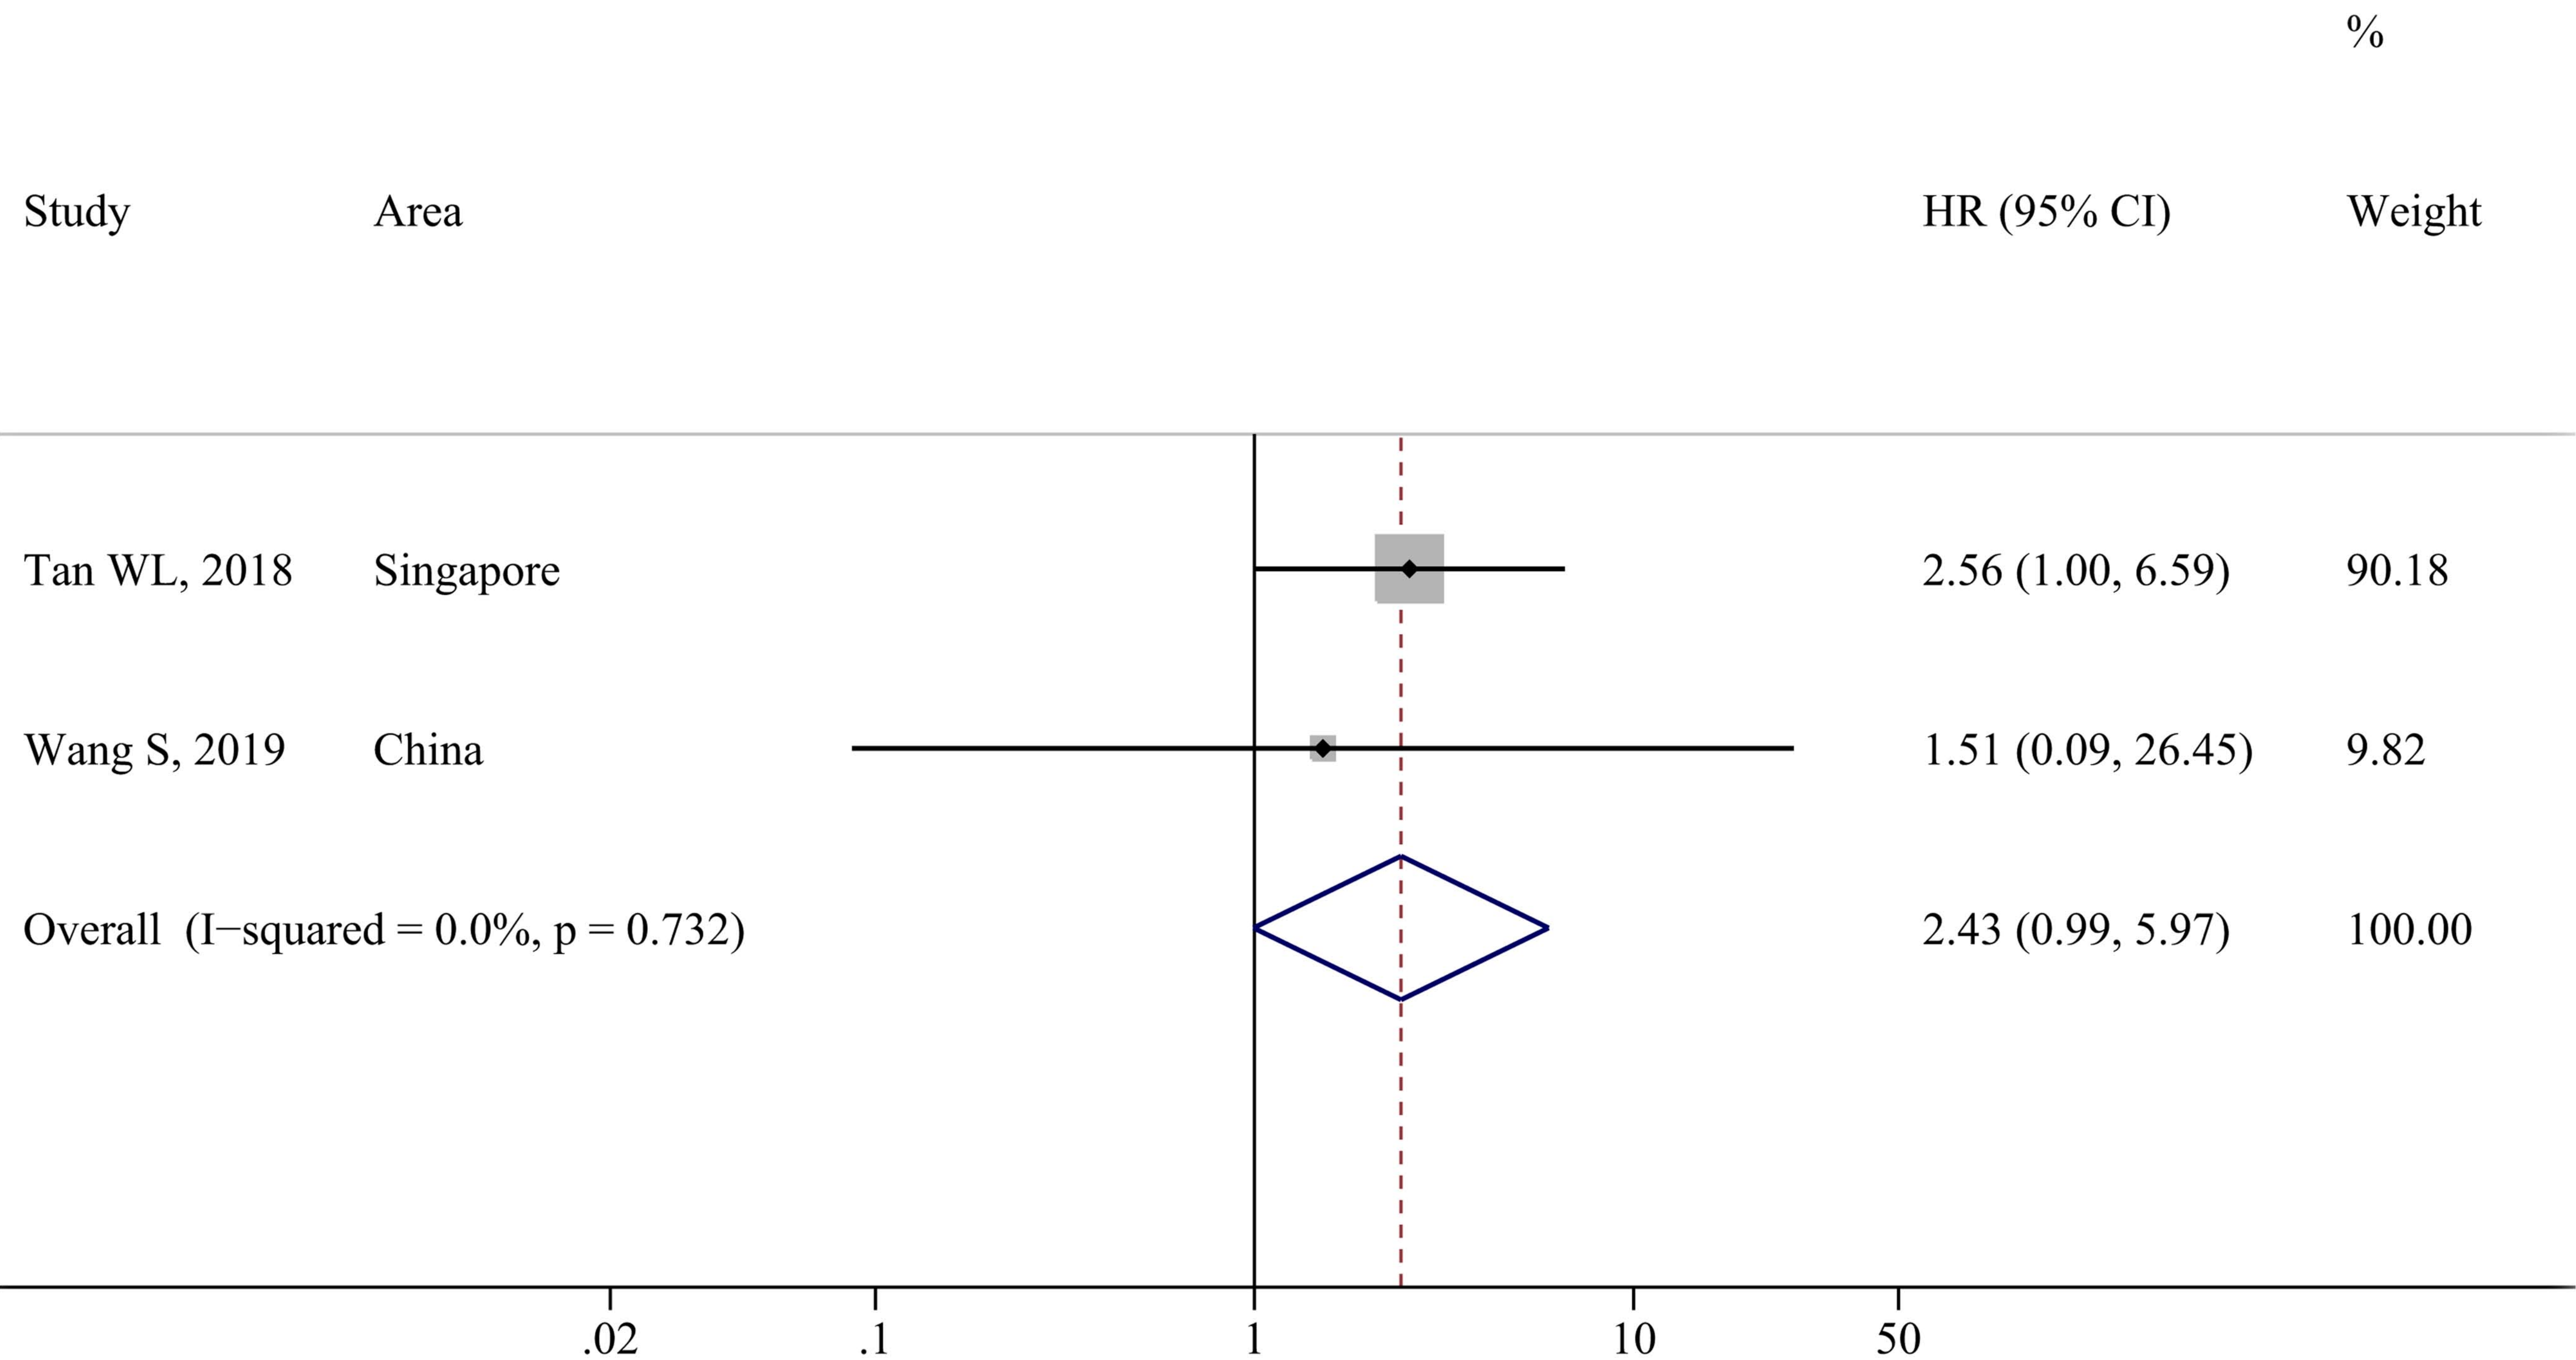

B

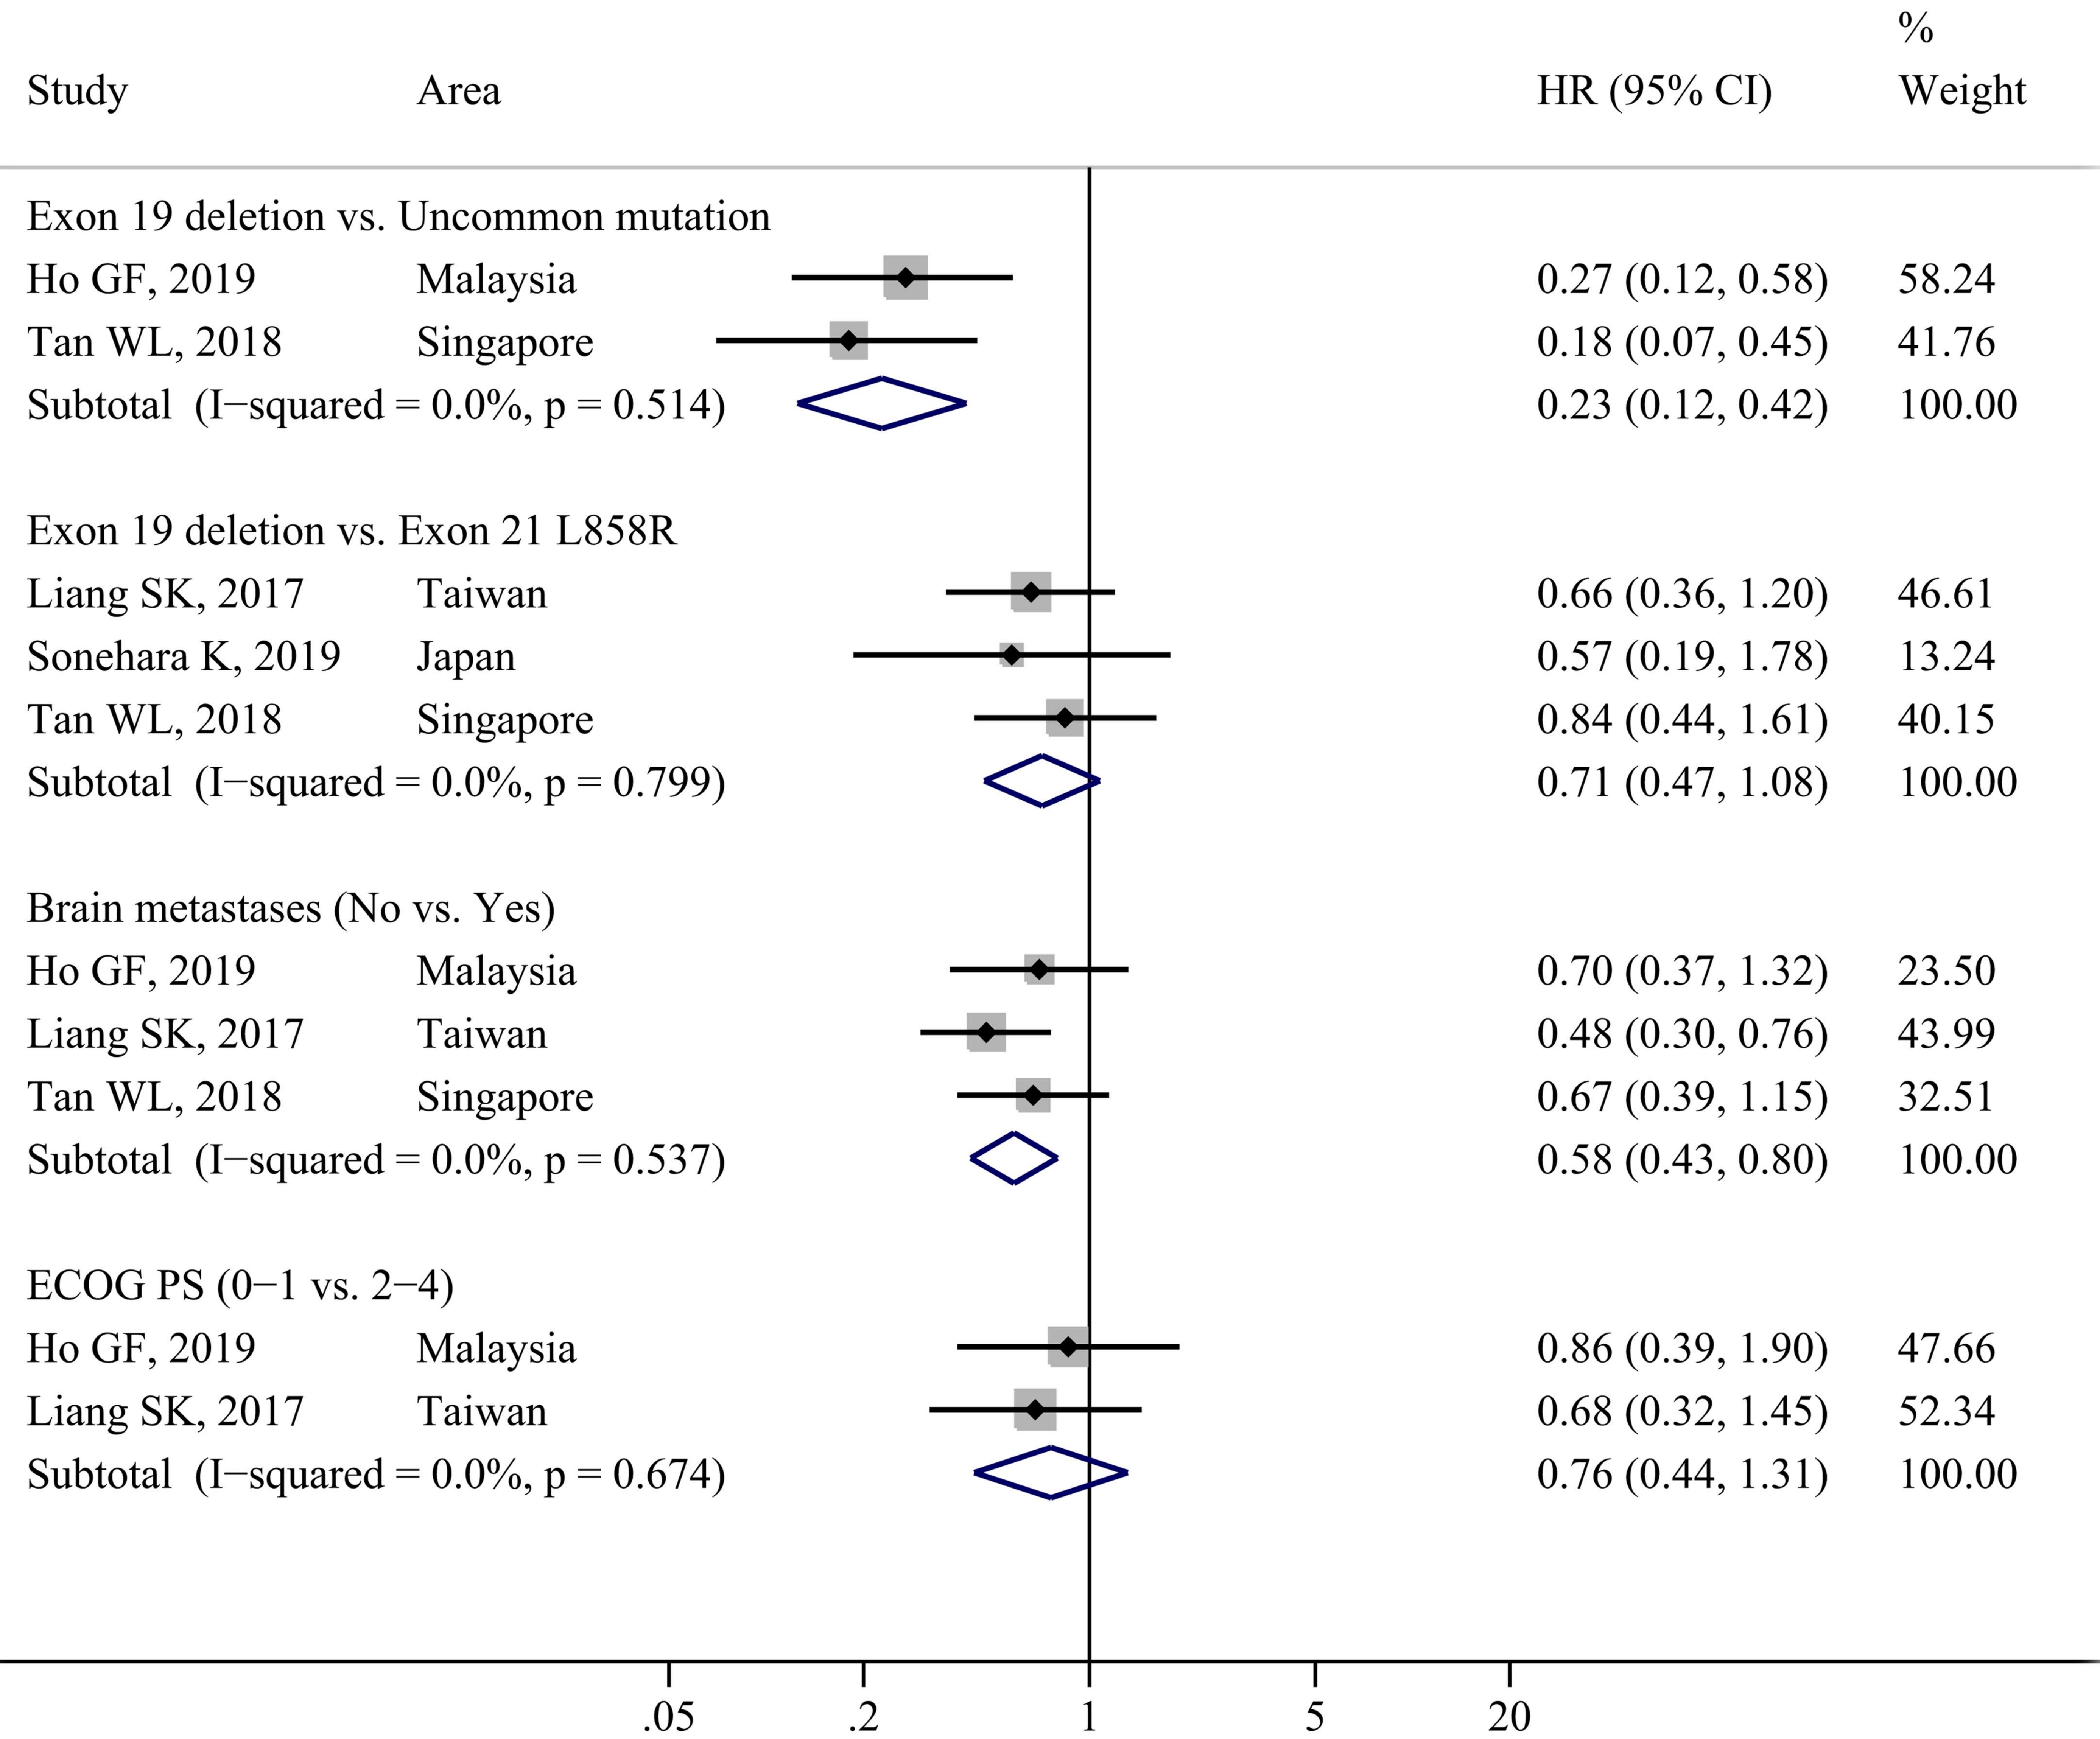

Supplement: f1 [file 8736288.f1.zip]

A

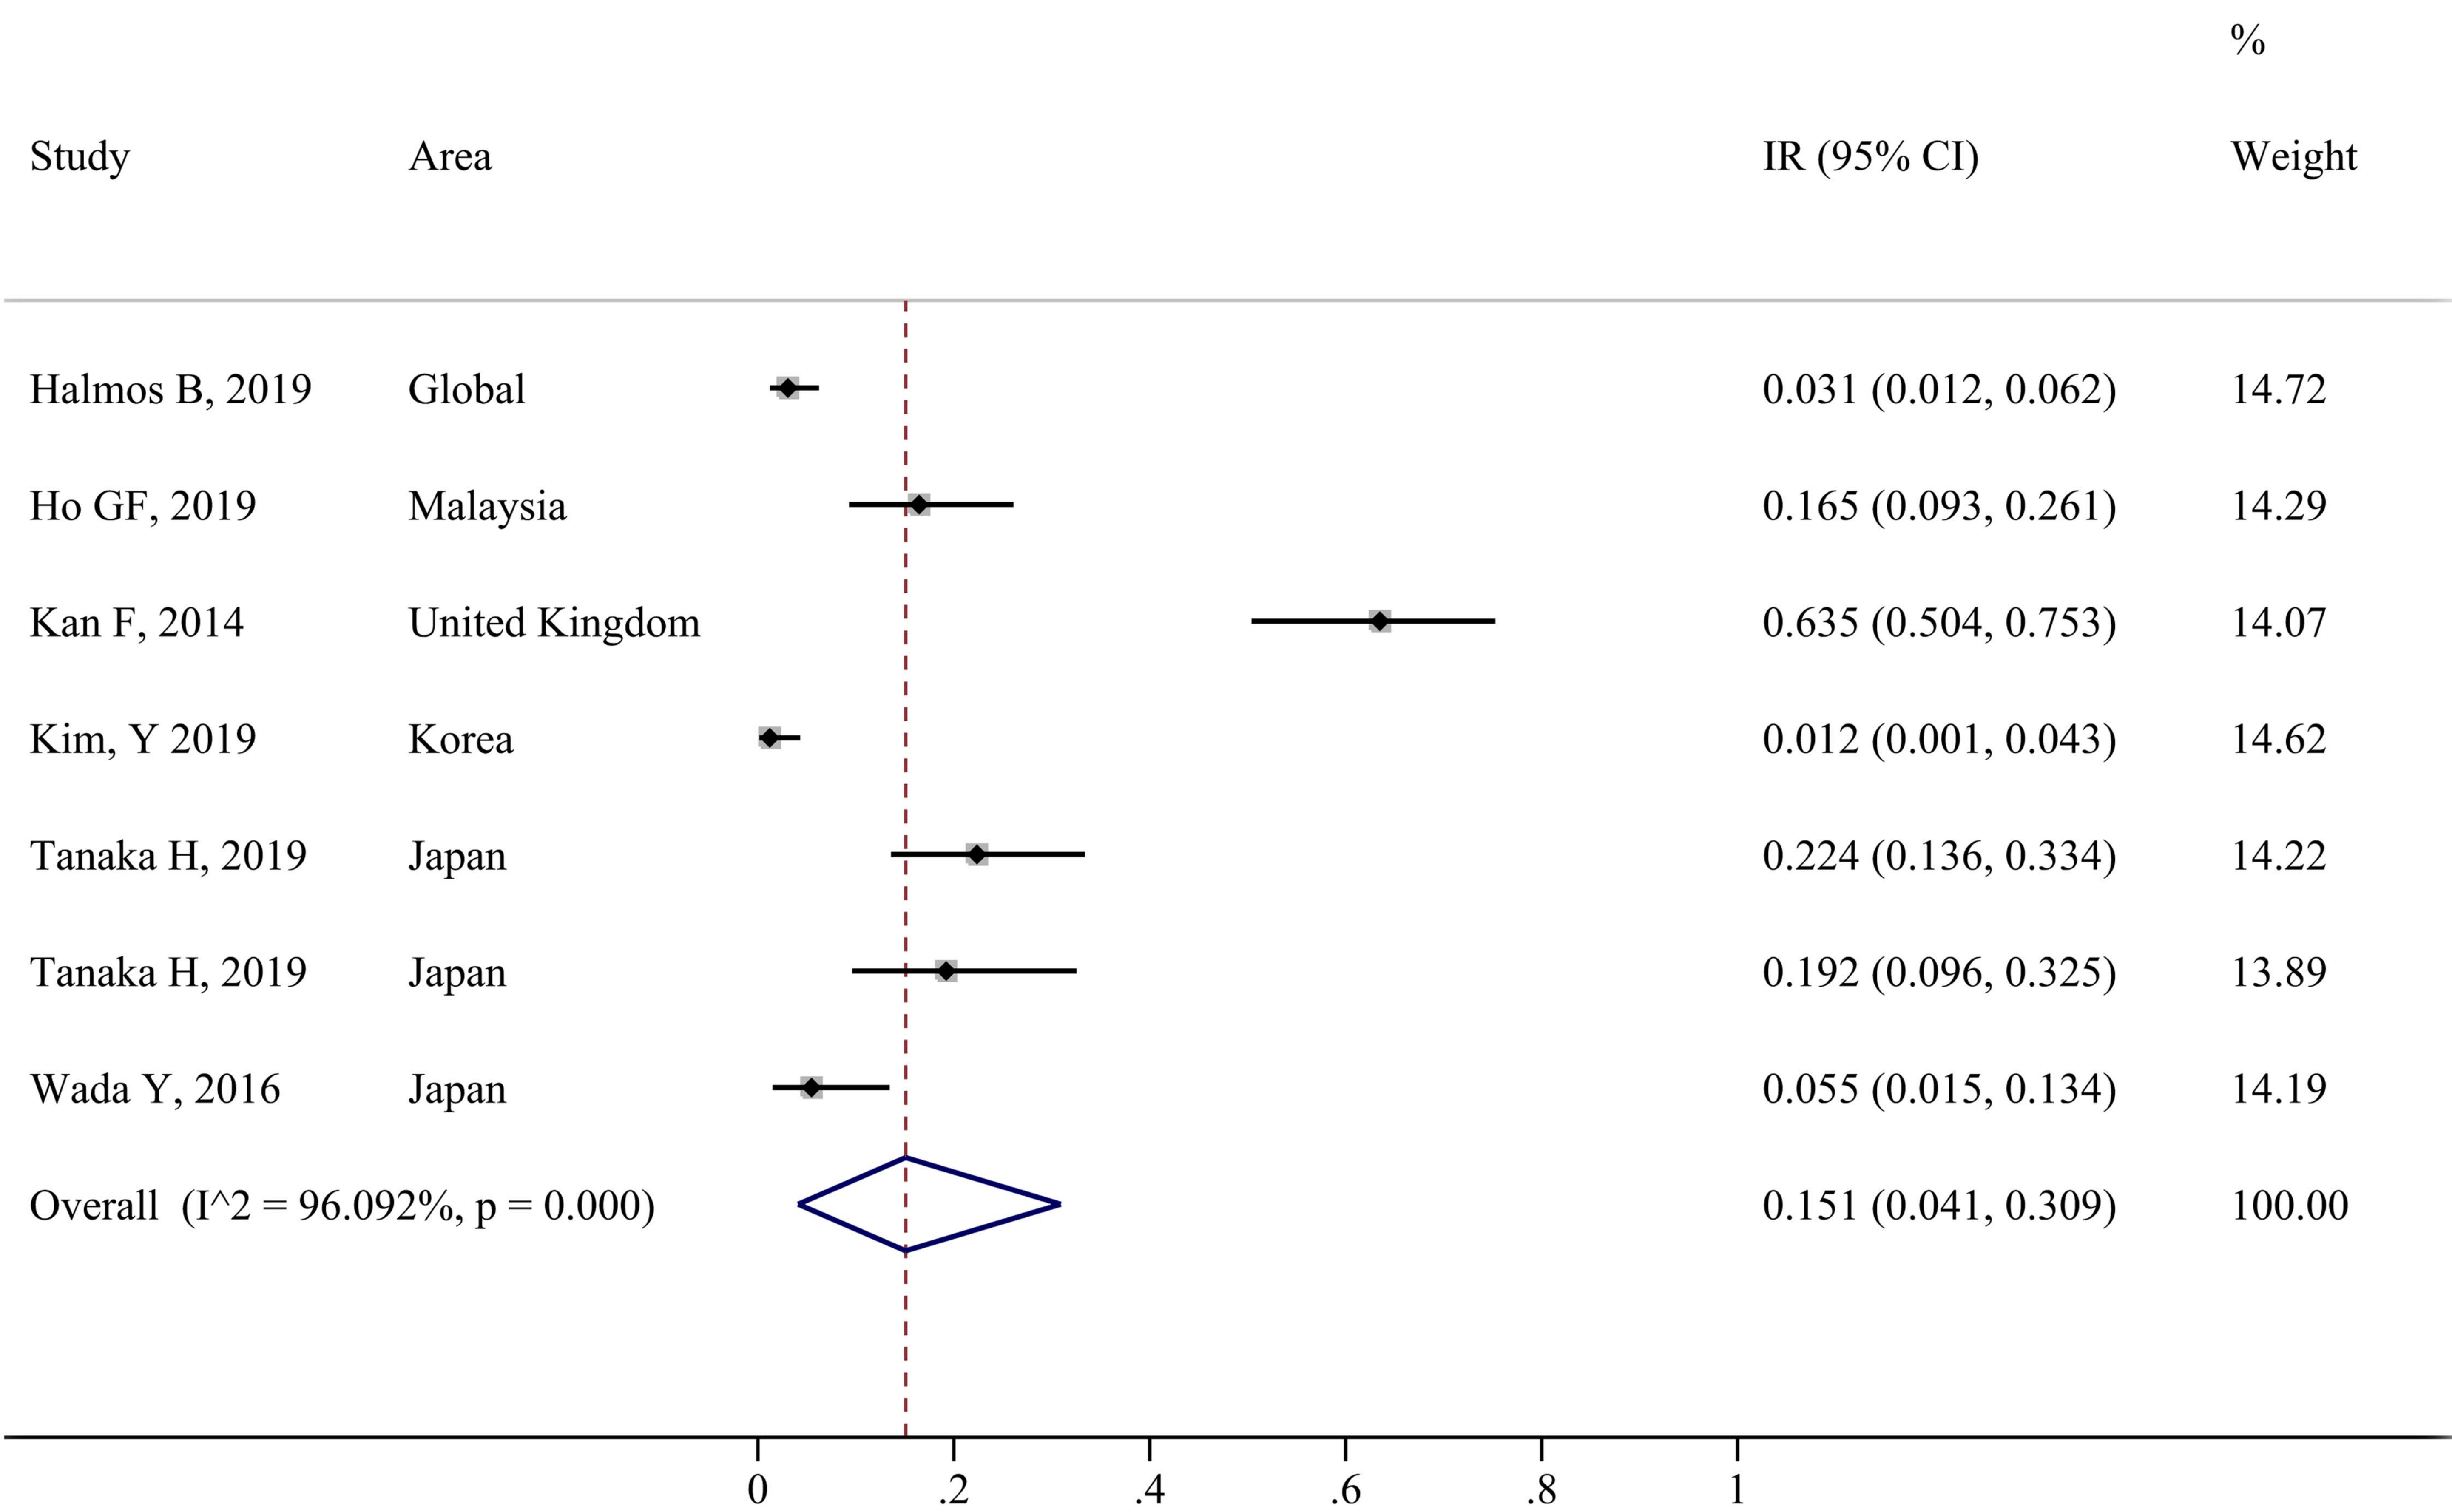

B

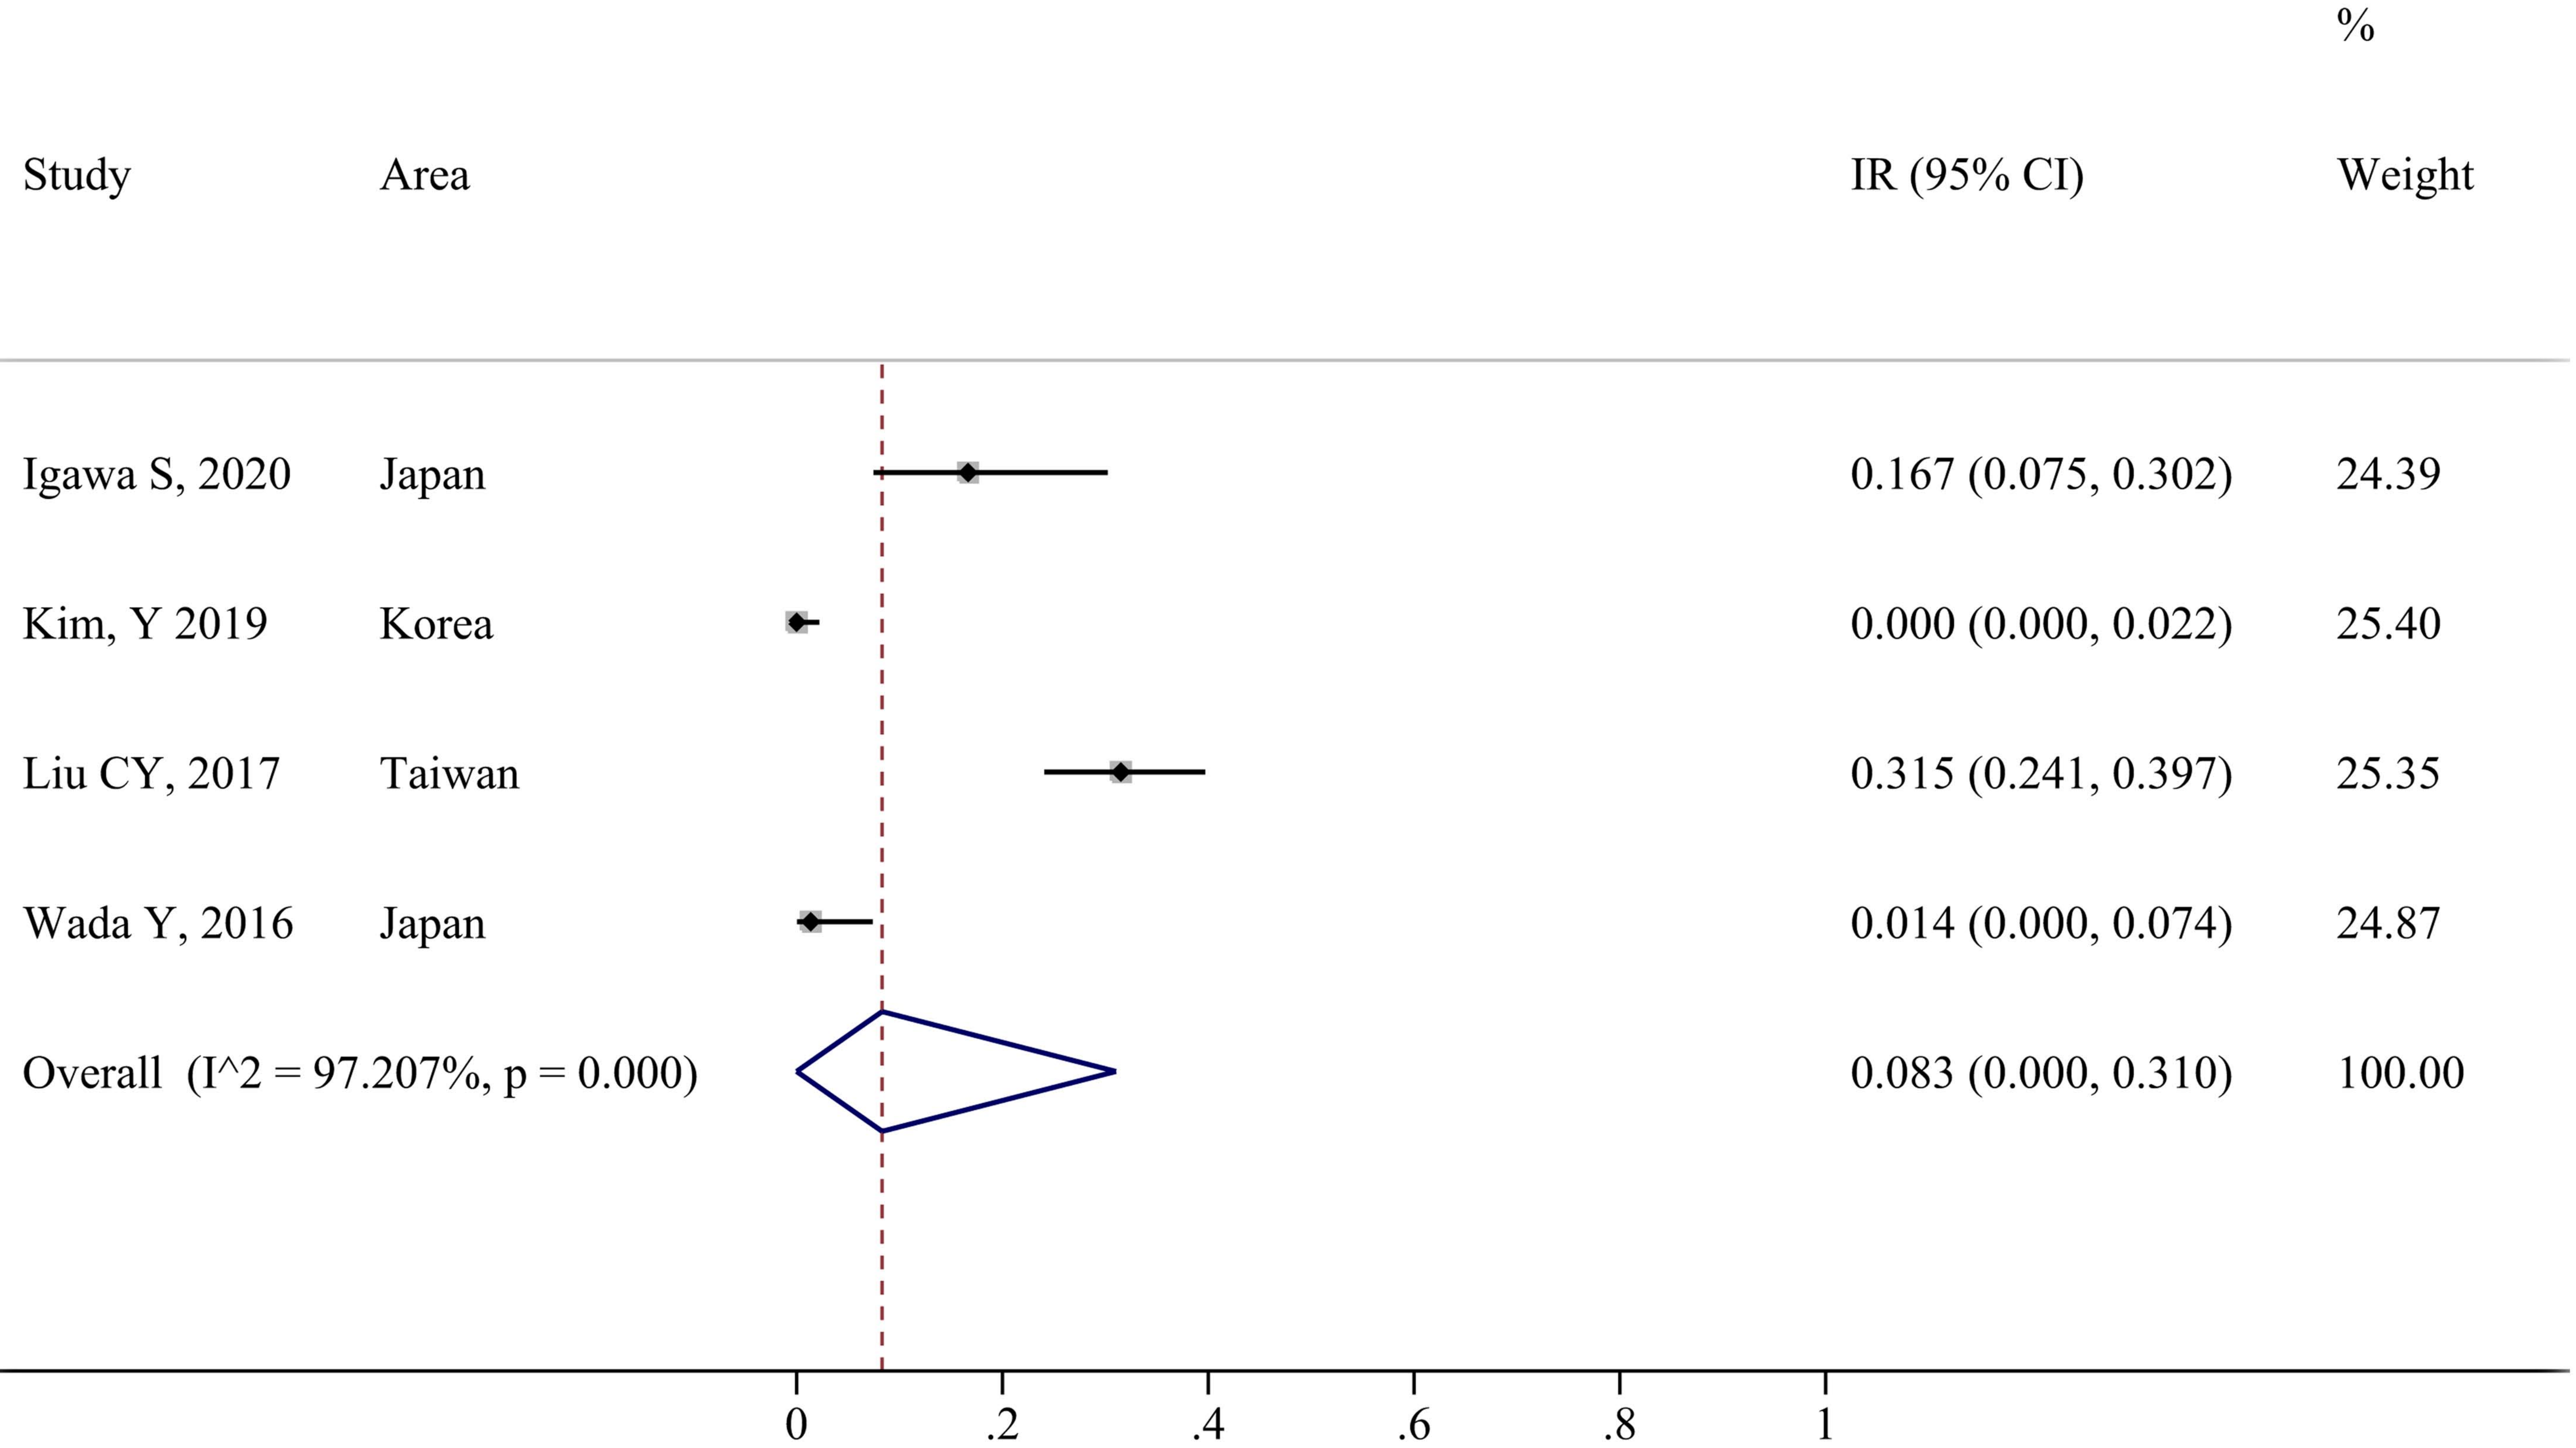

C

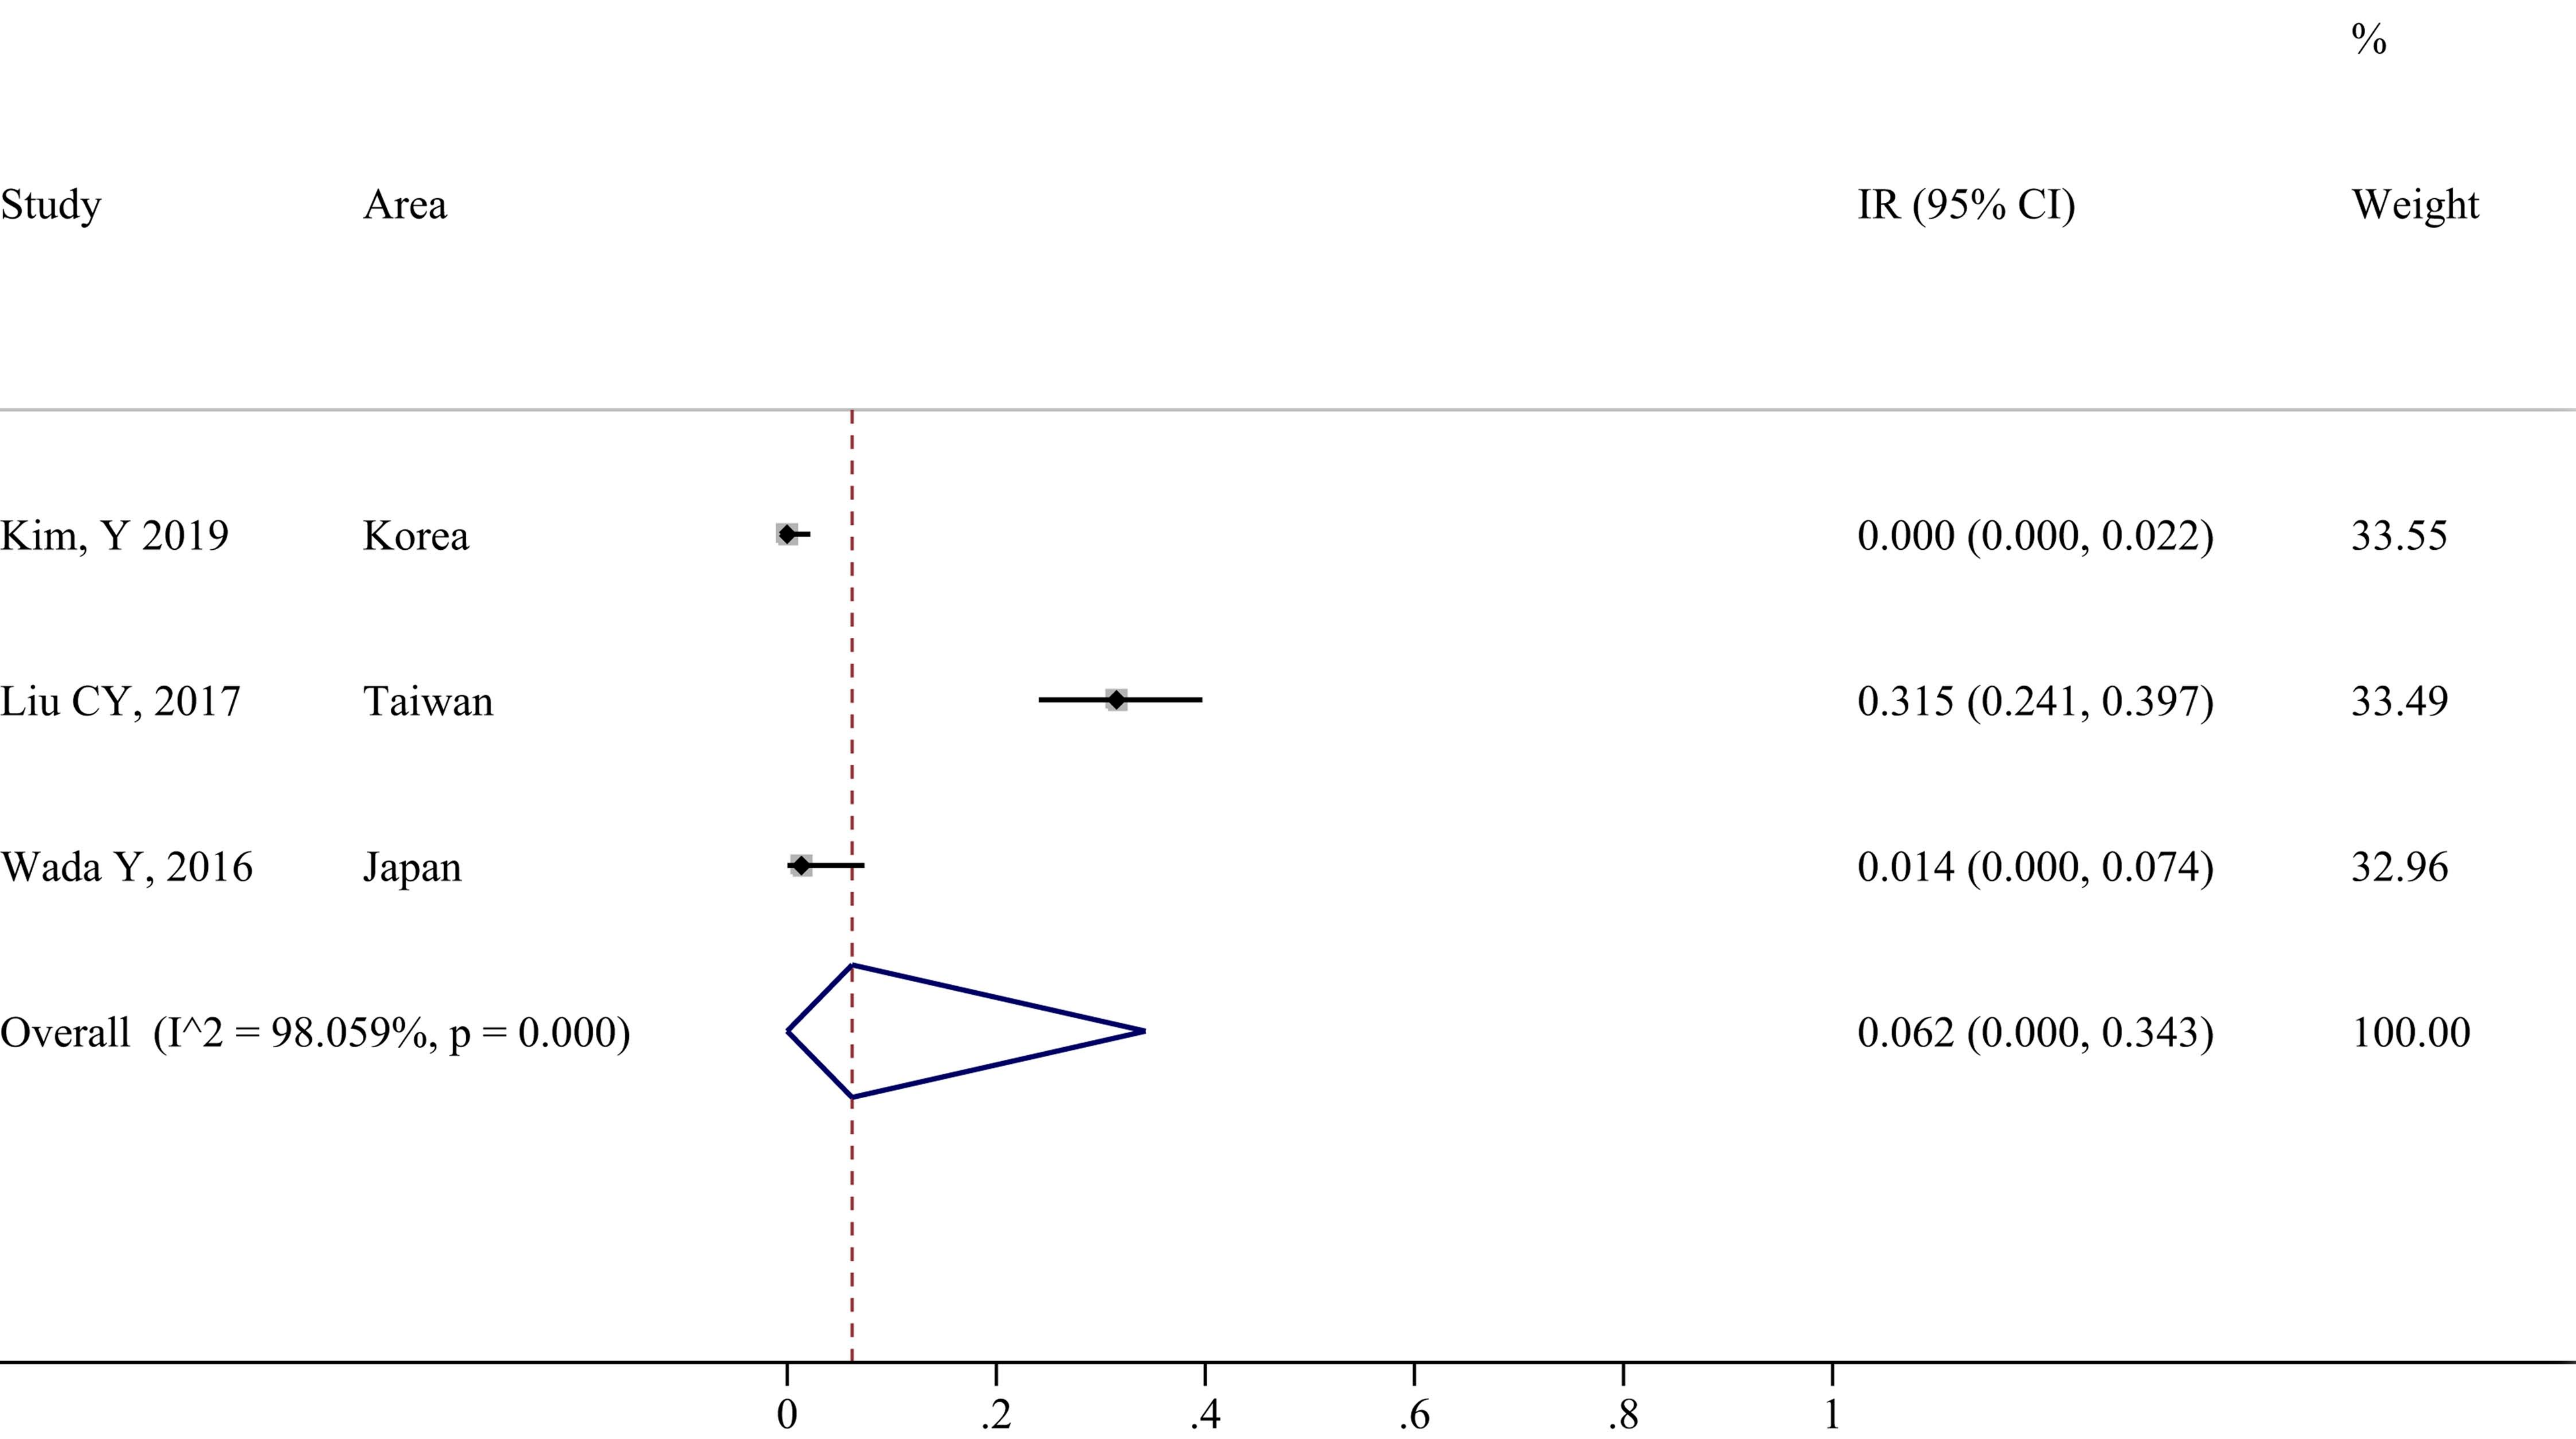

D

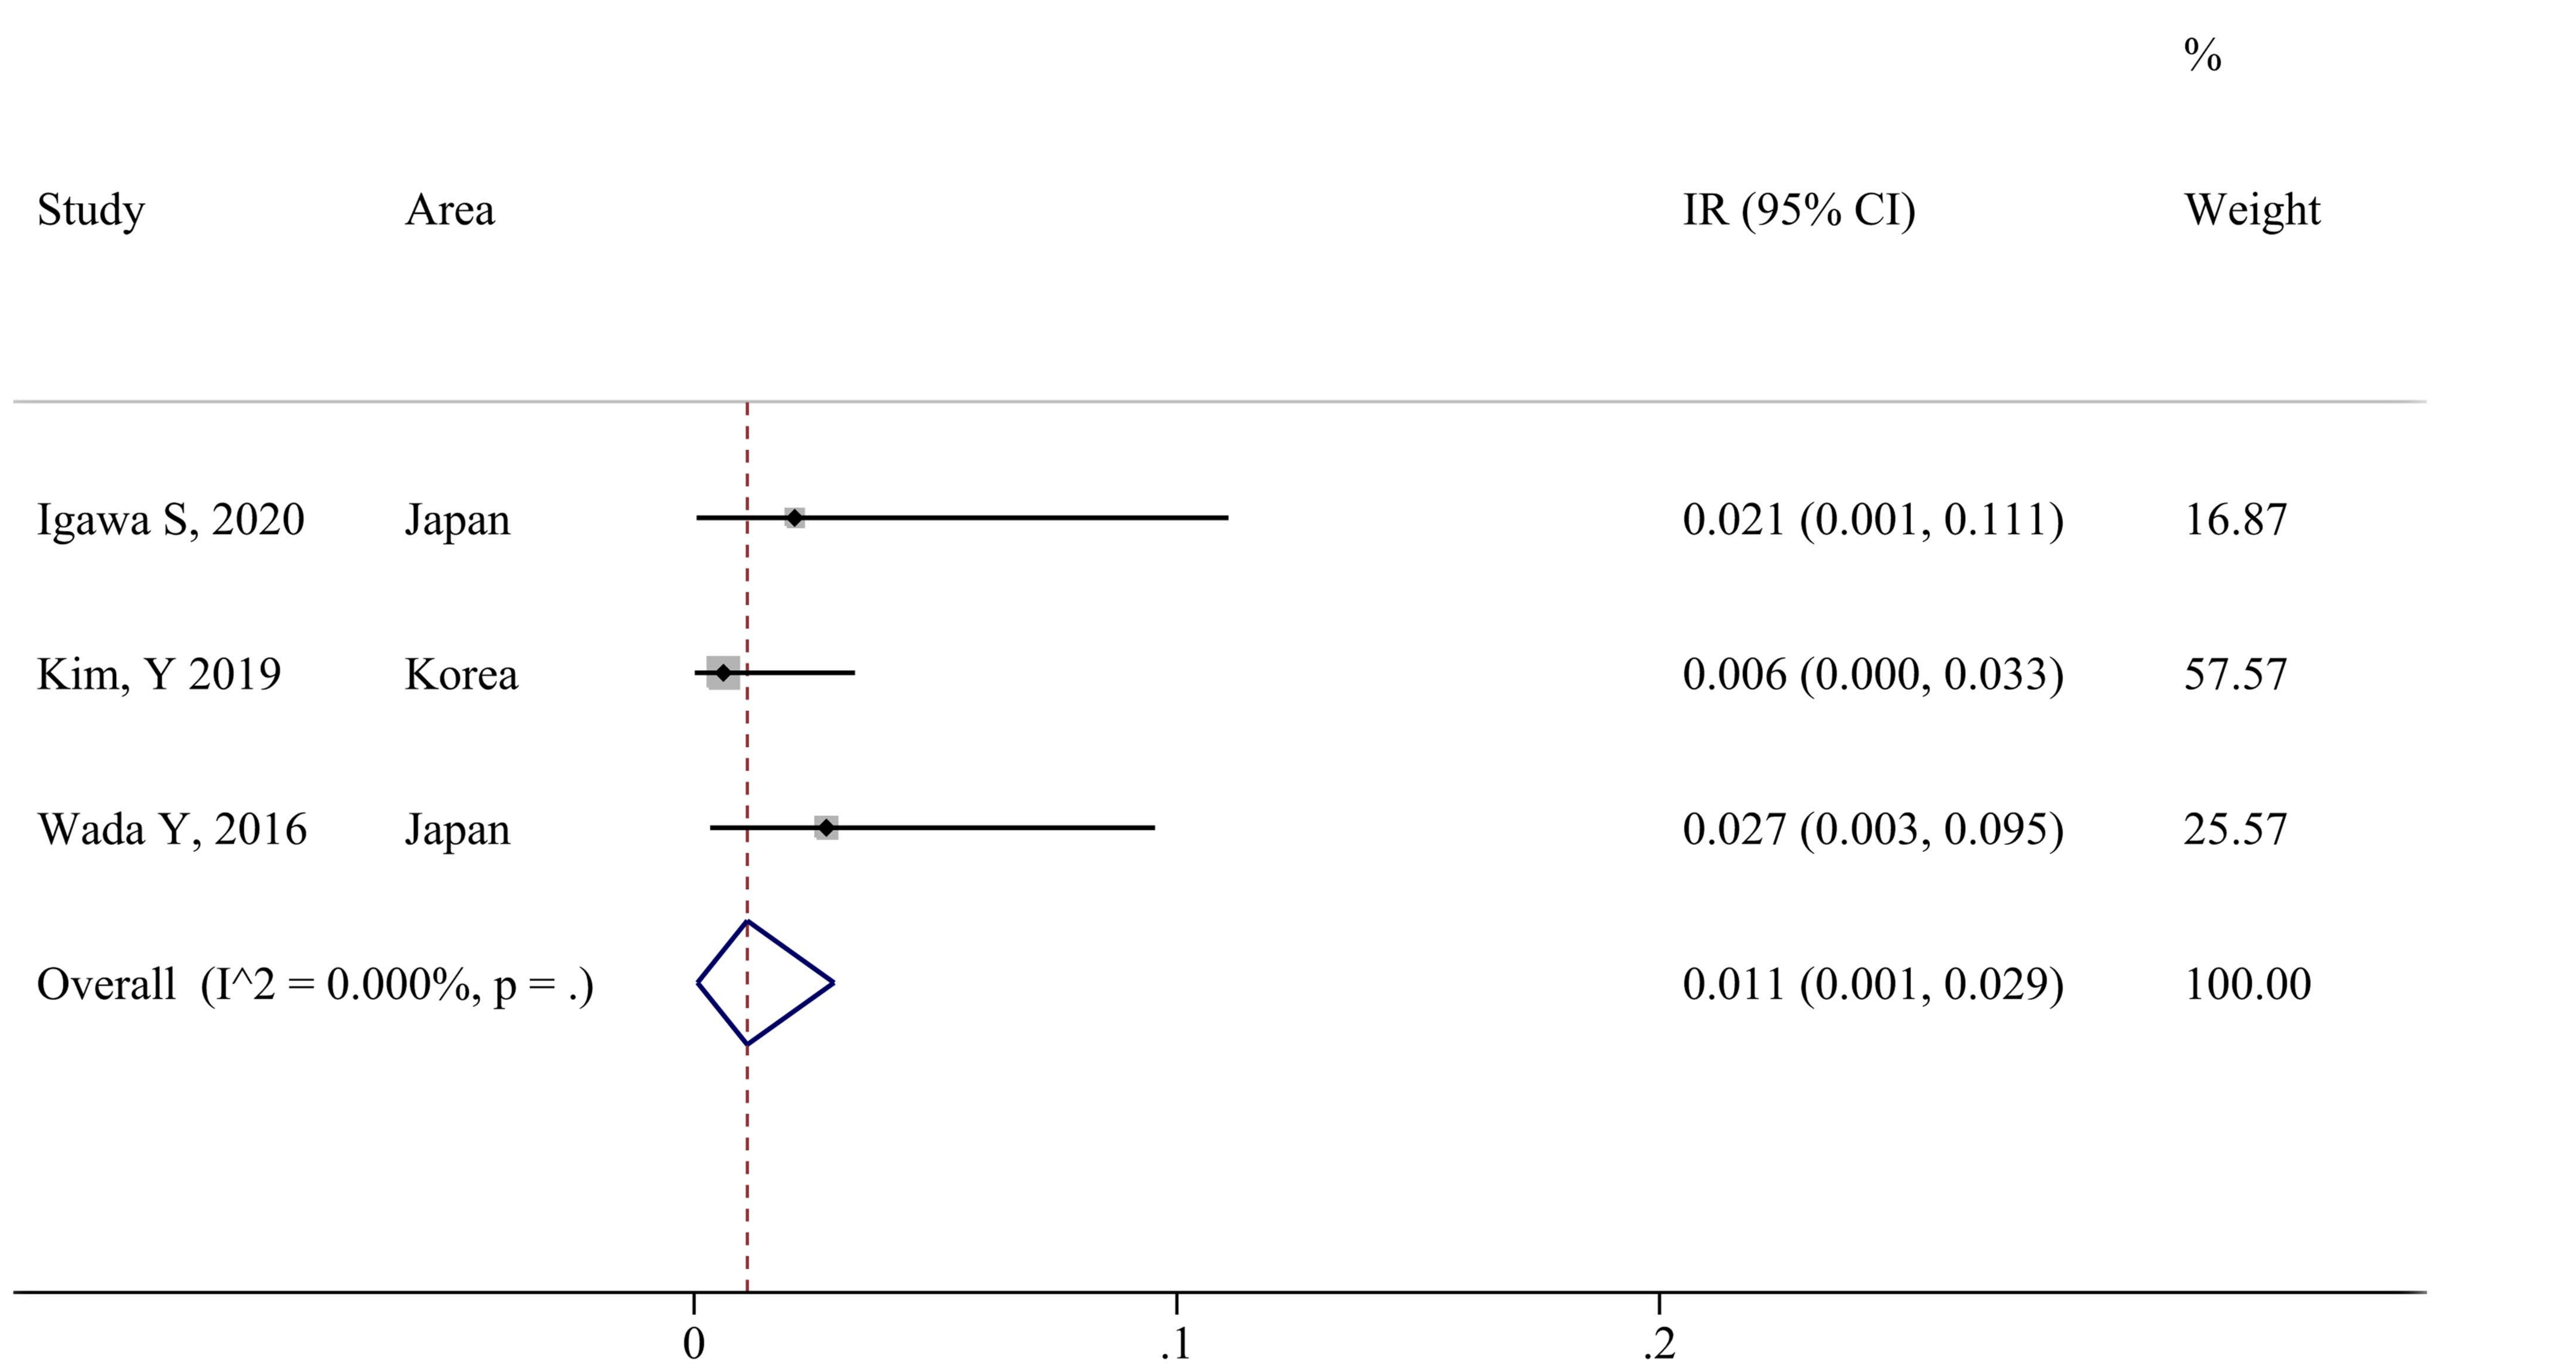

Supplement: f1 [file 8736288.f1.zip]

A

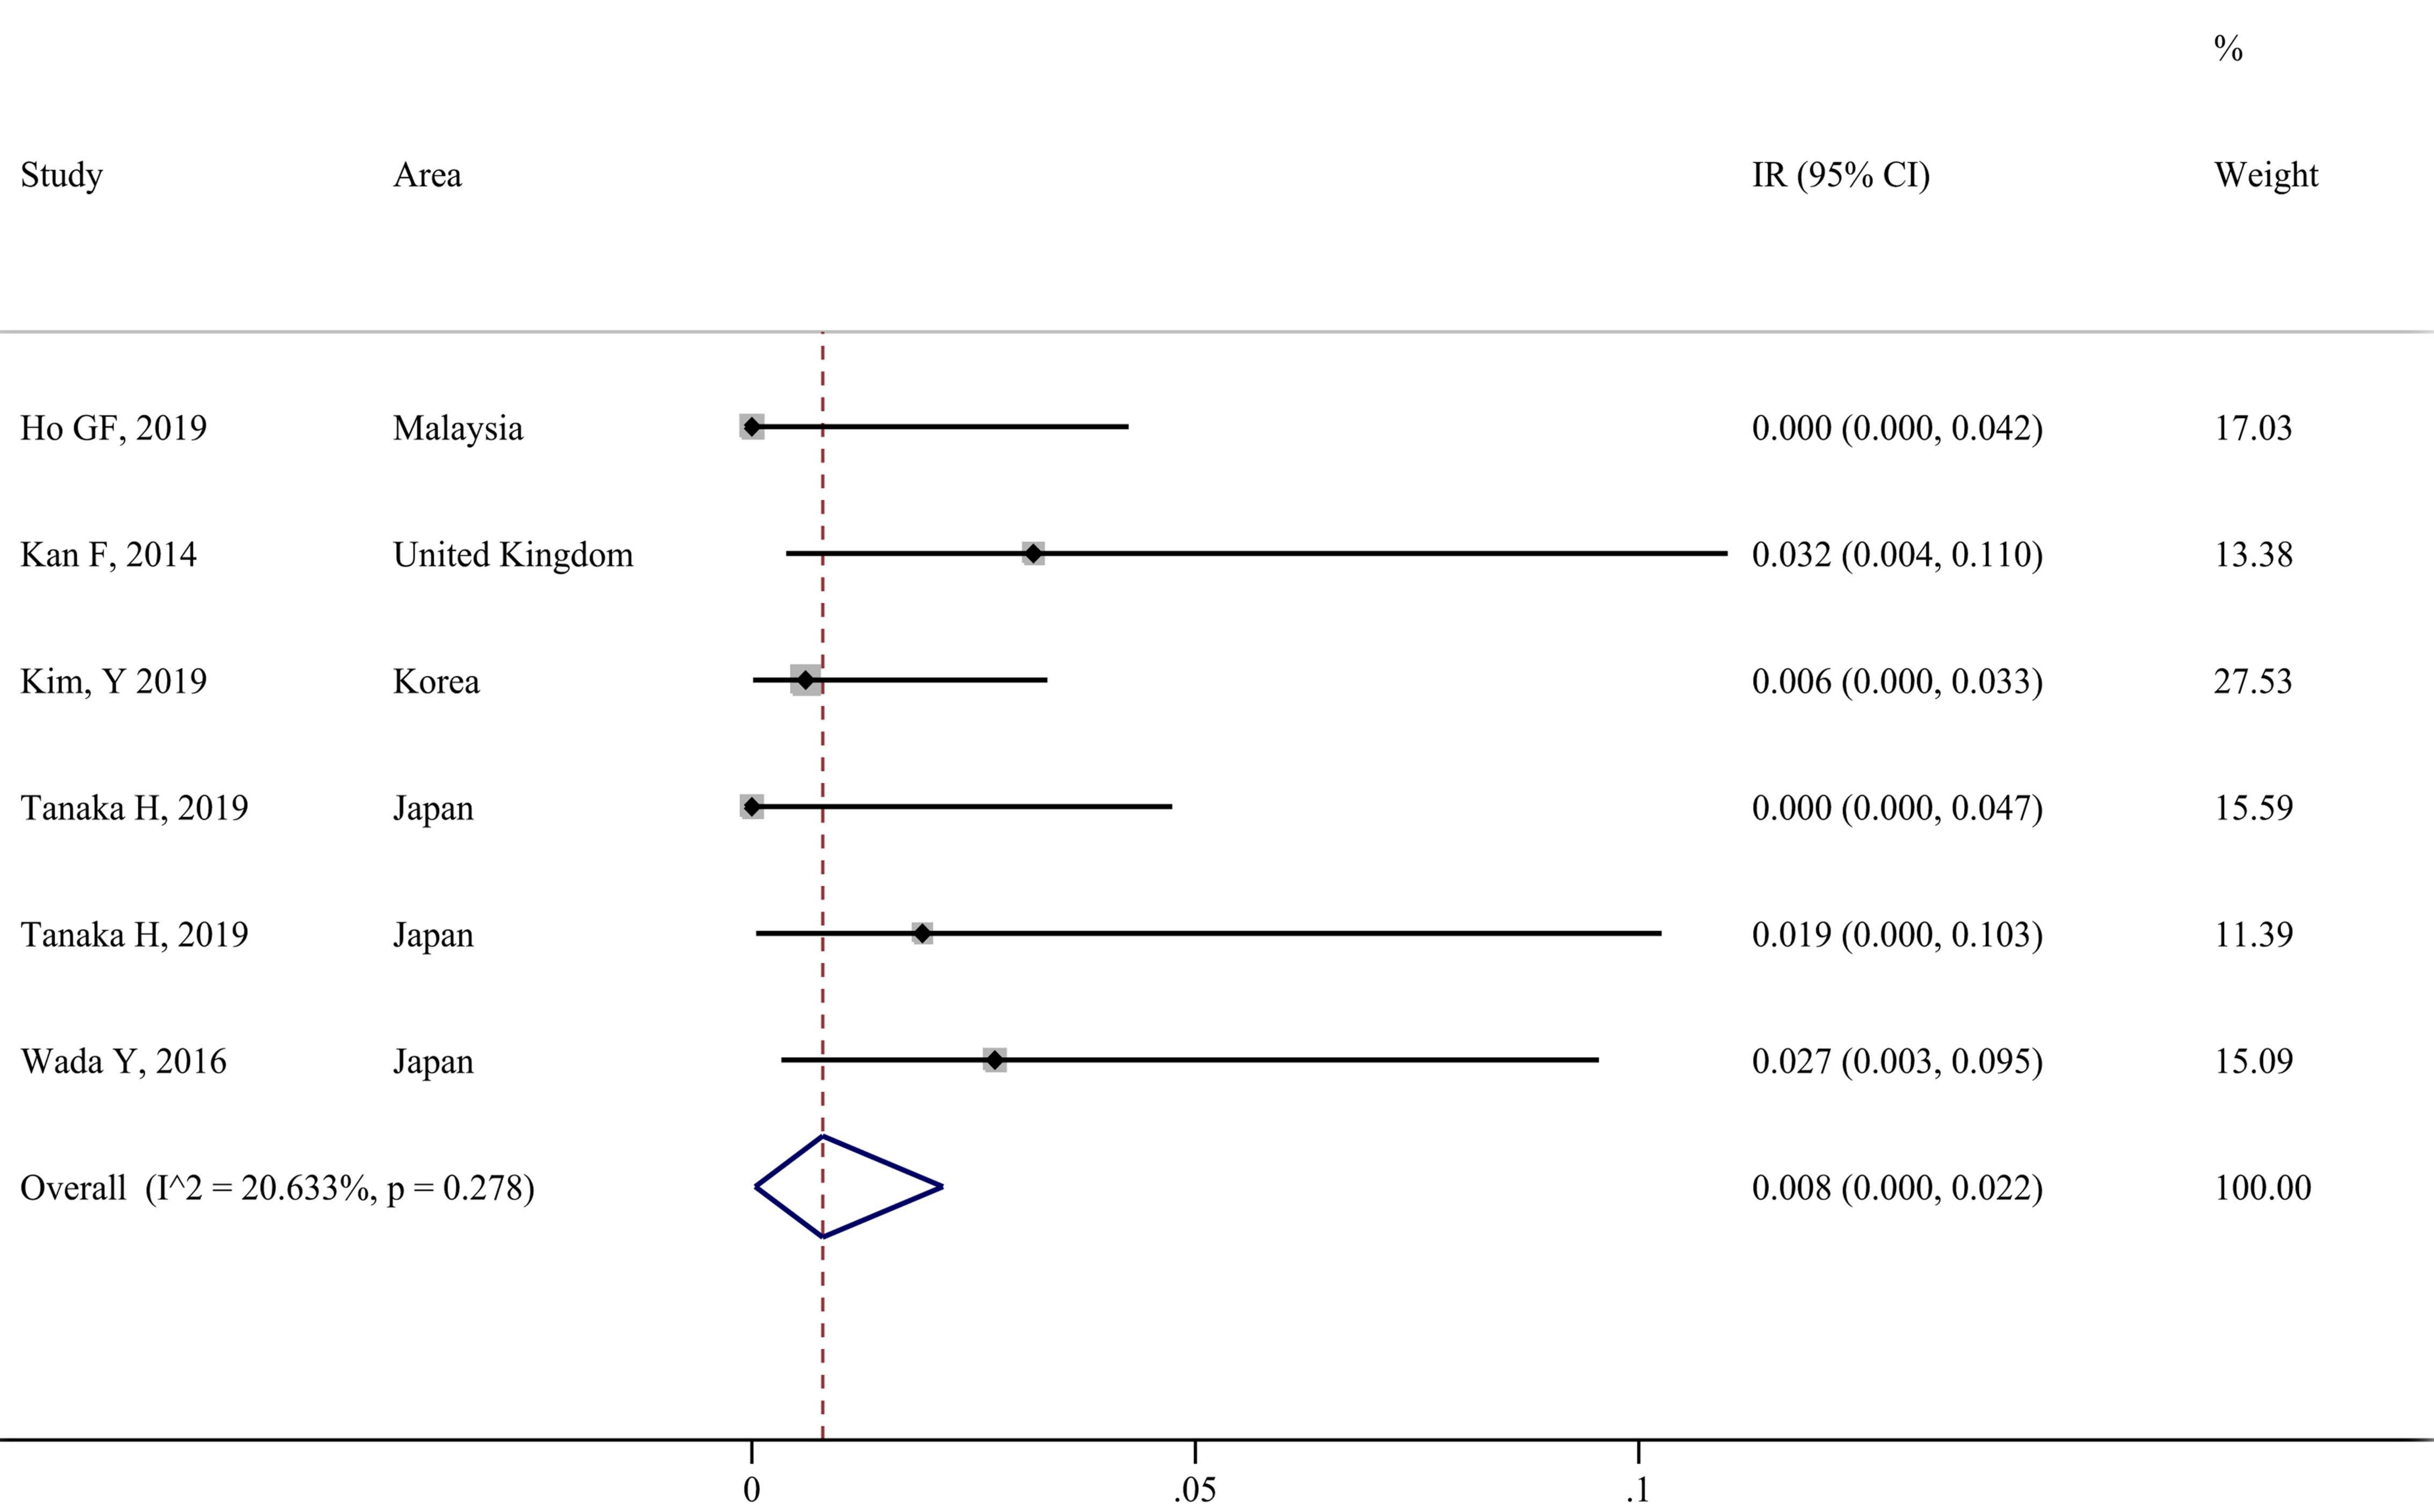

B

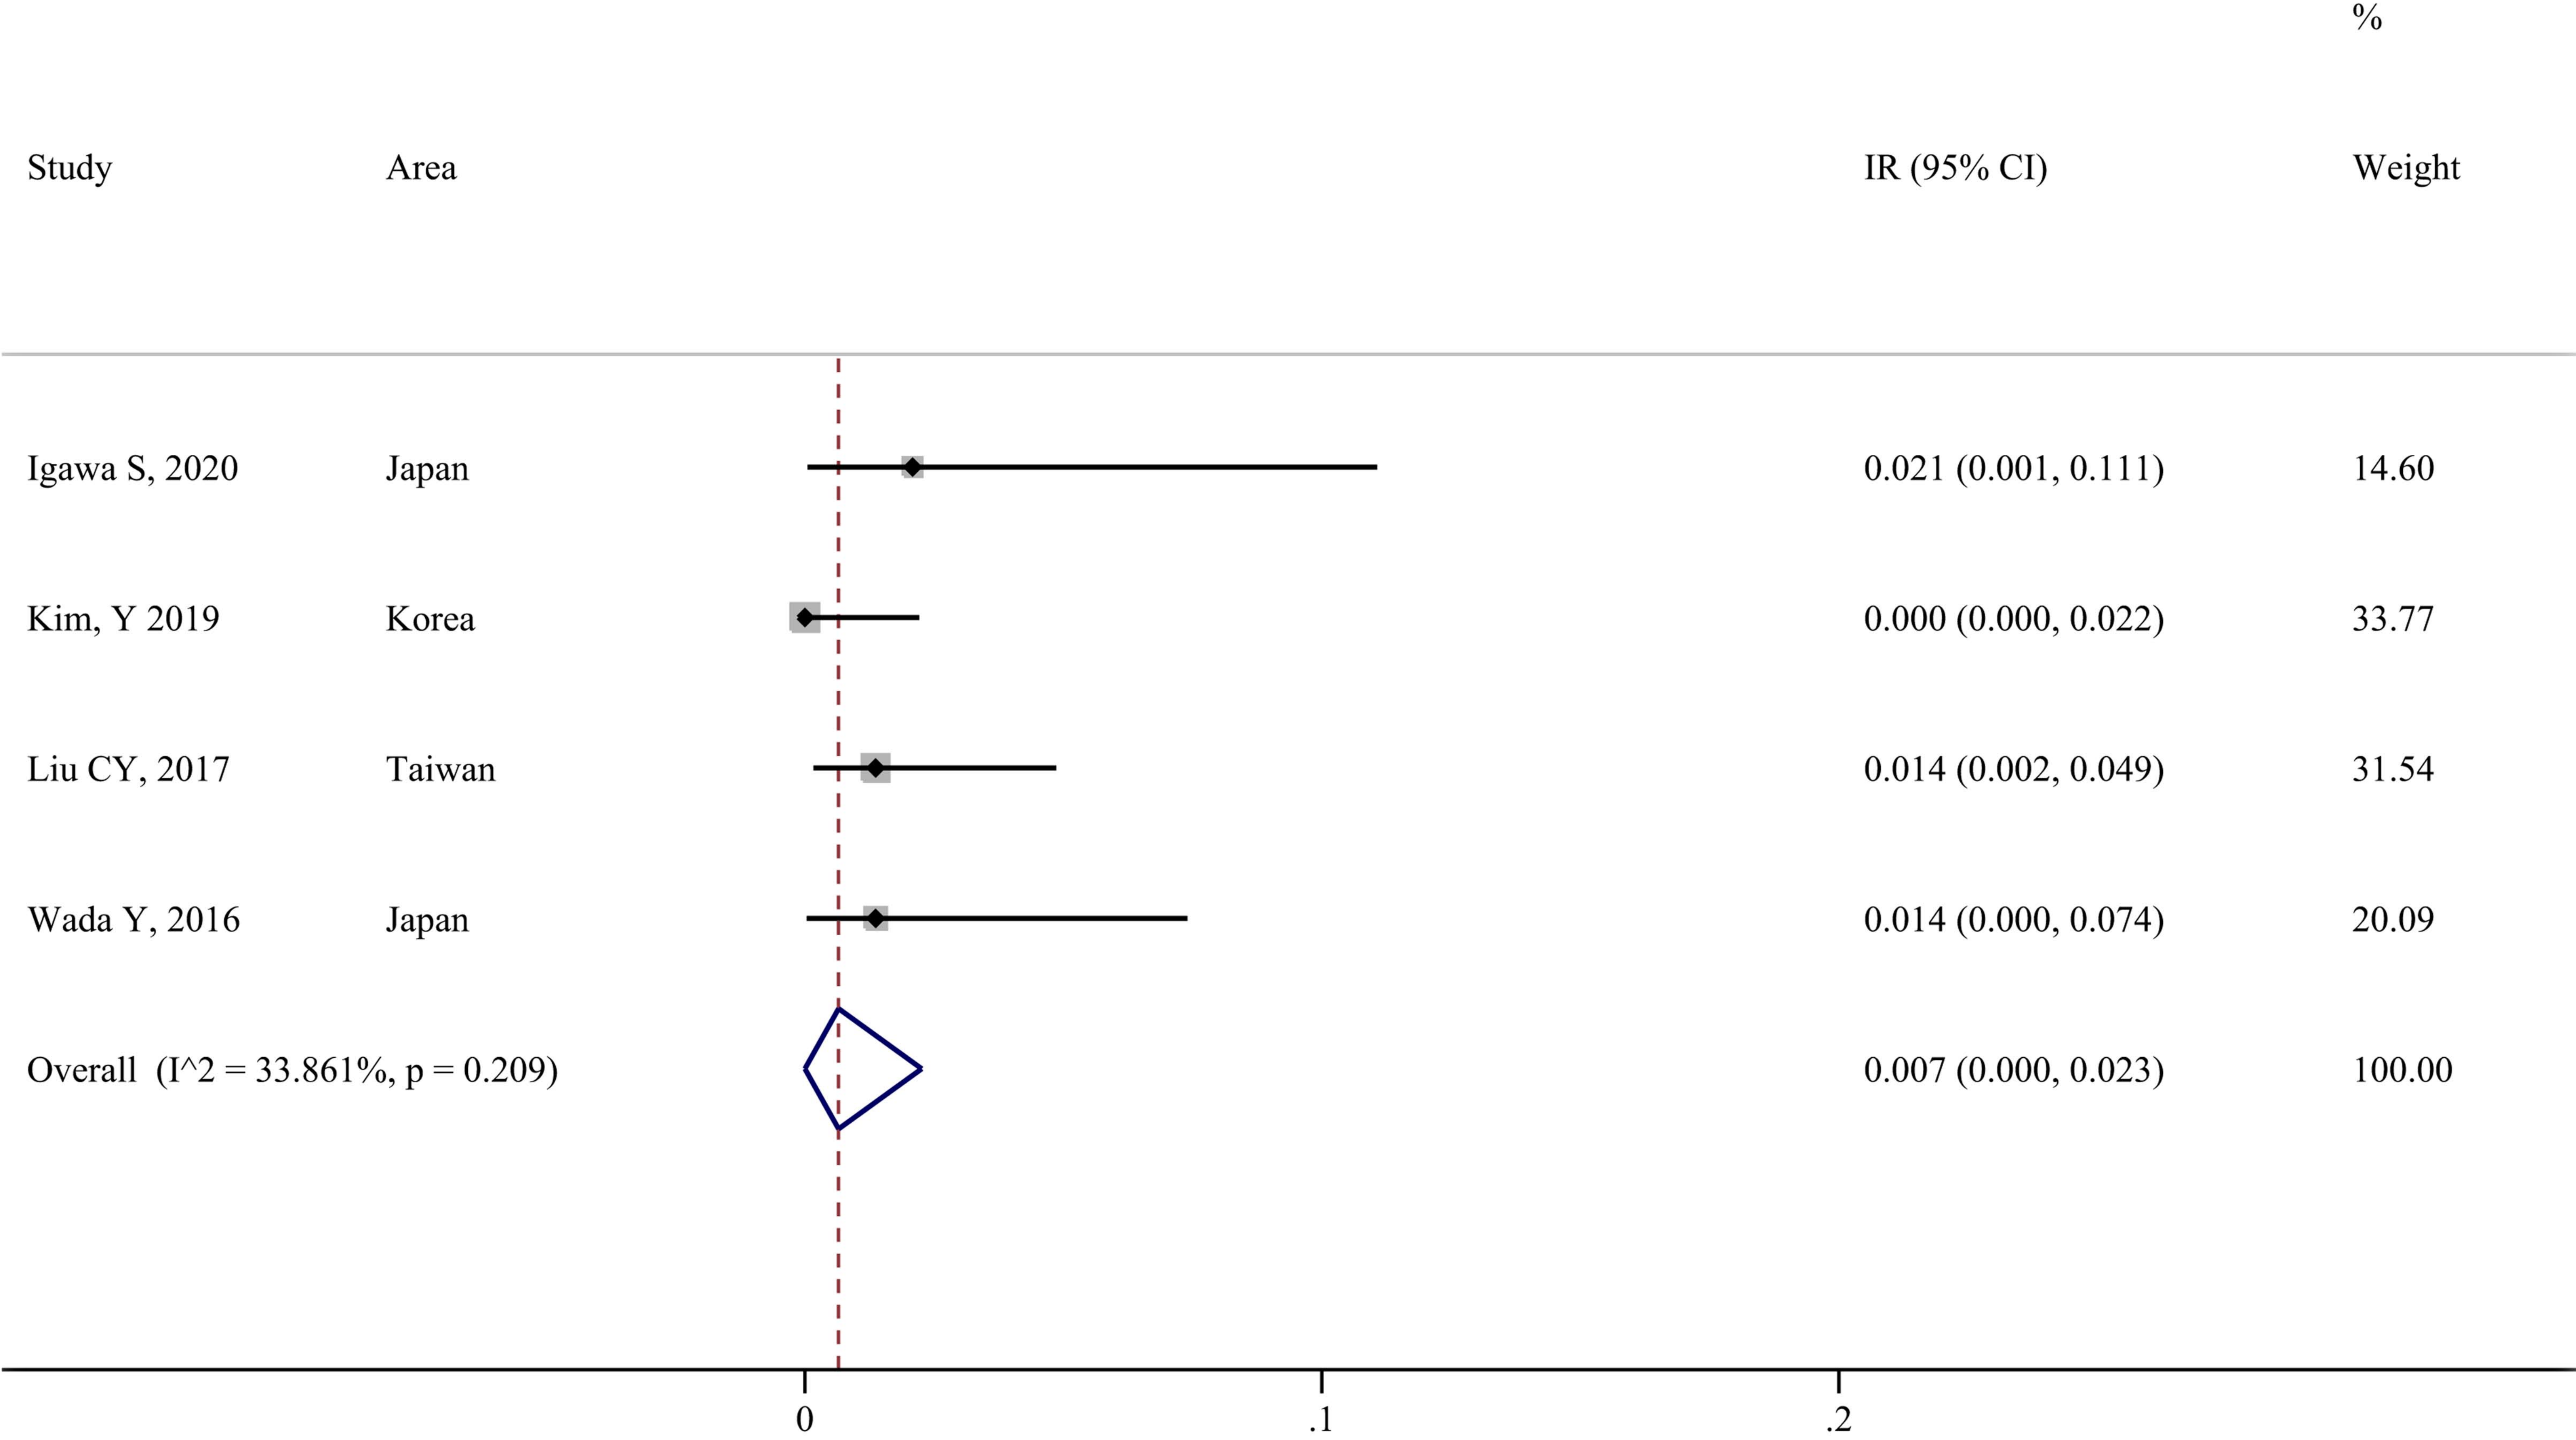

C

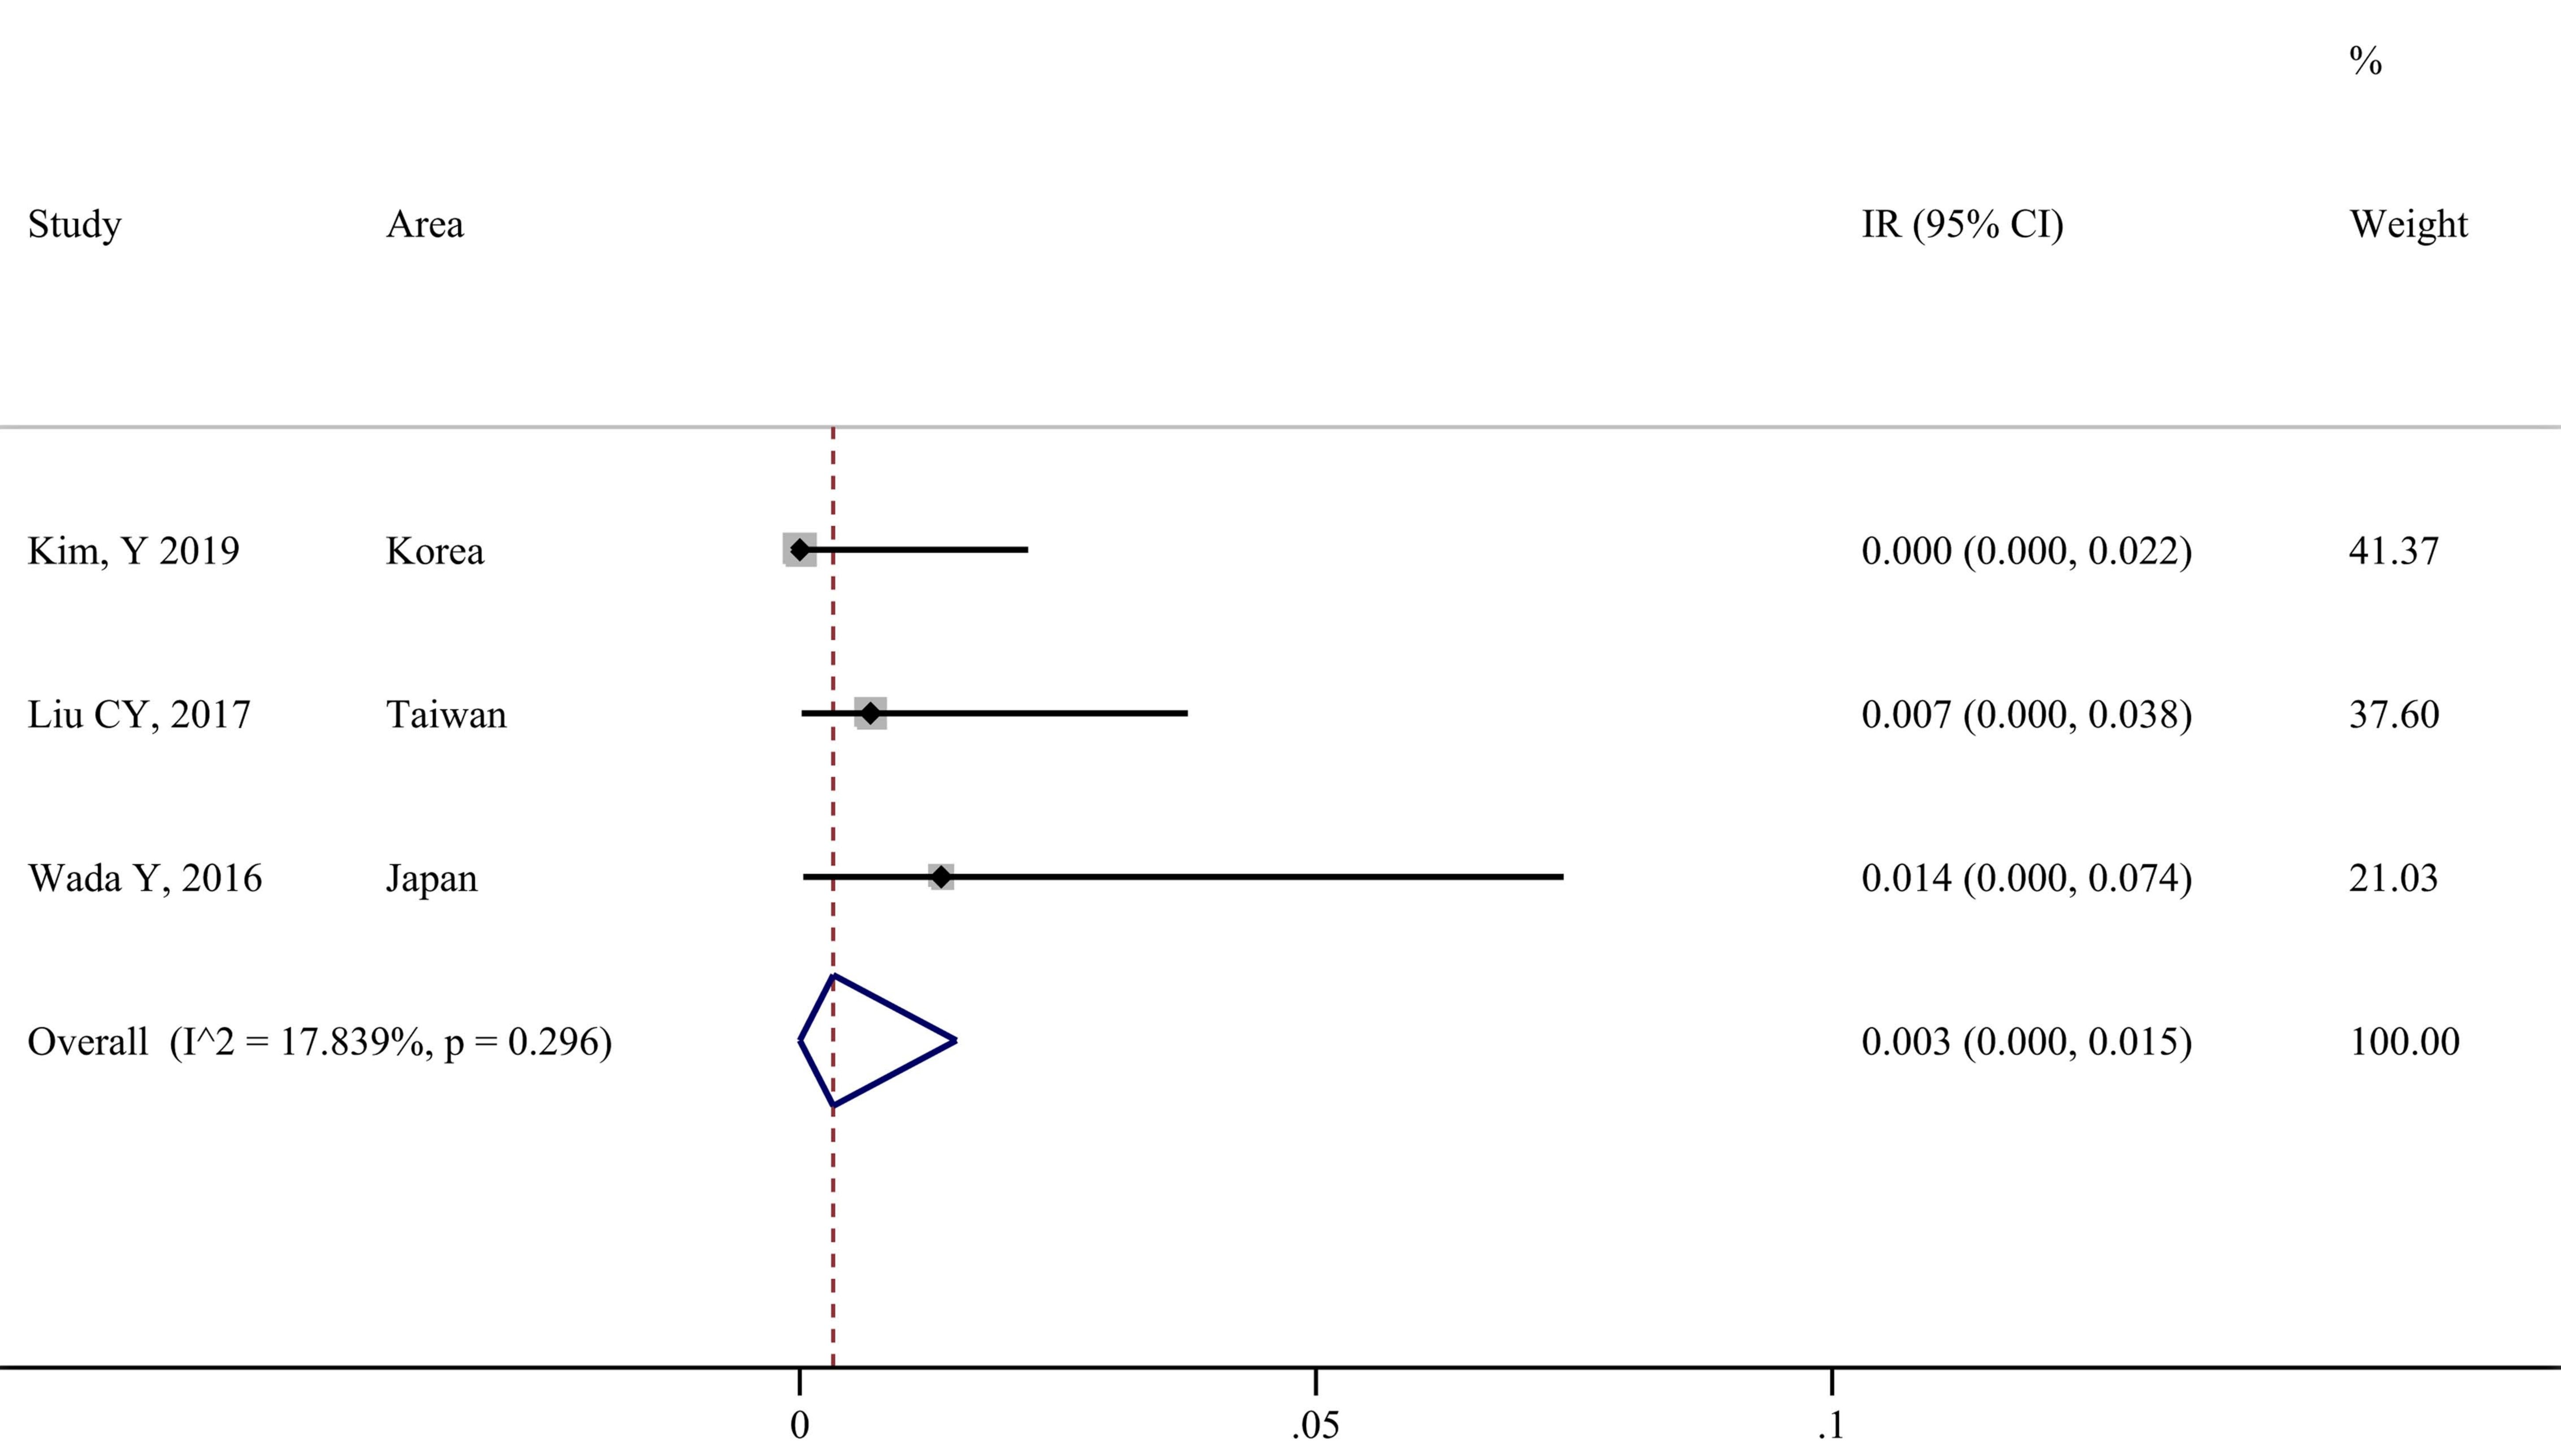

D

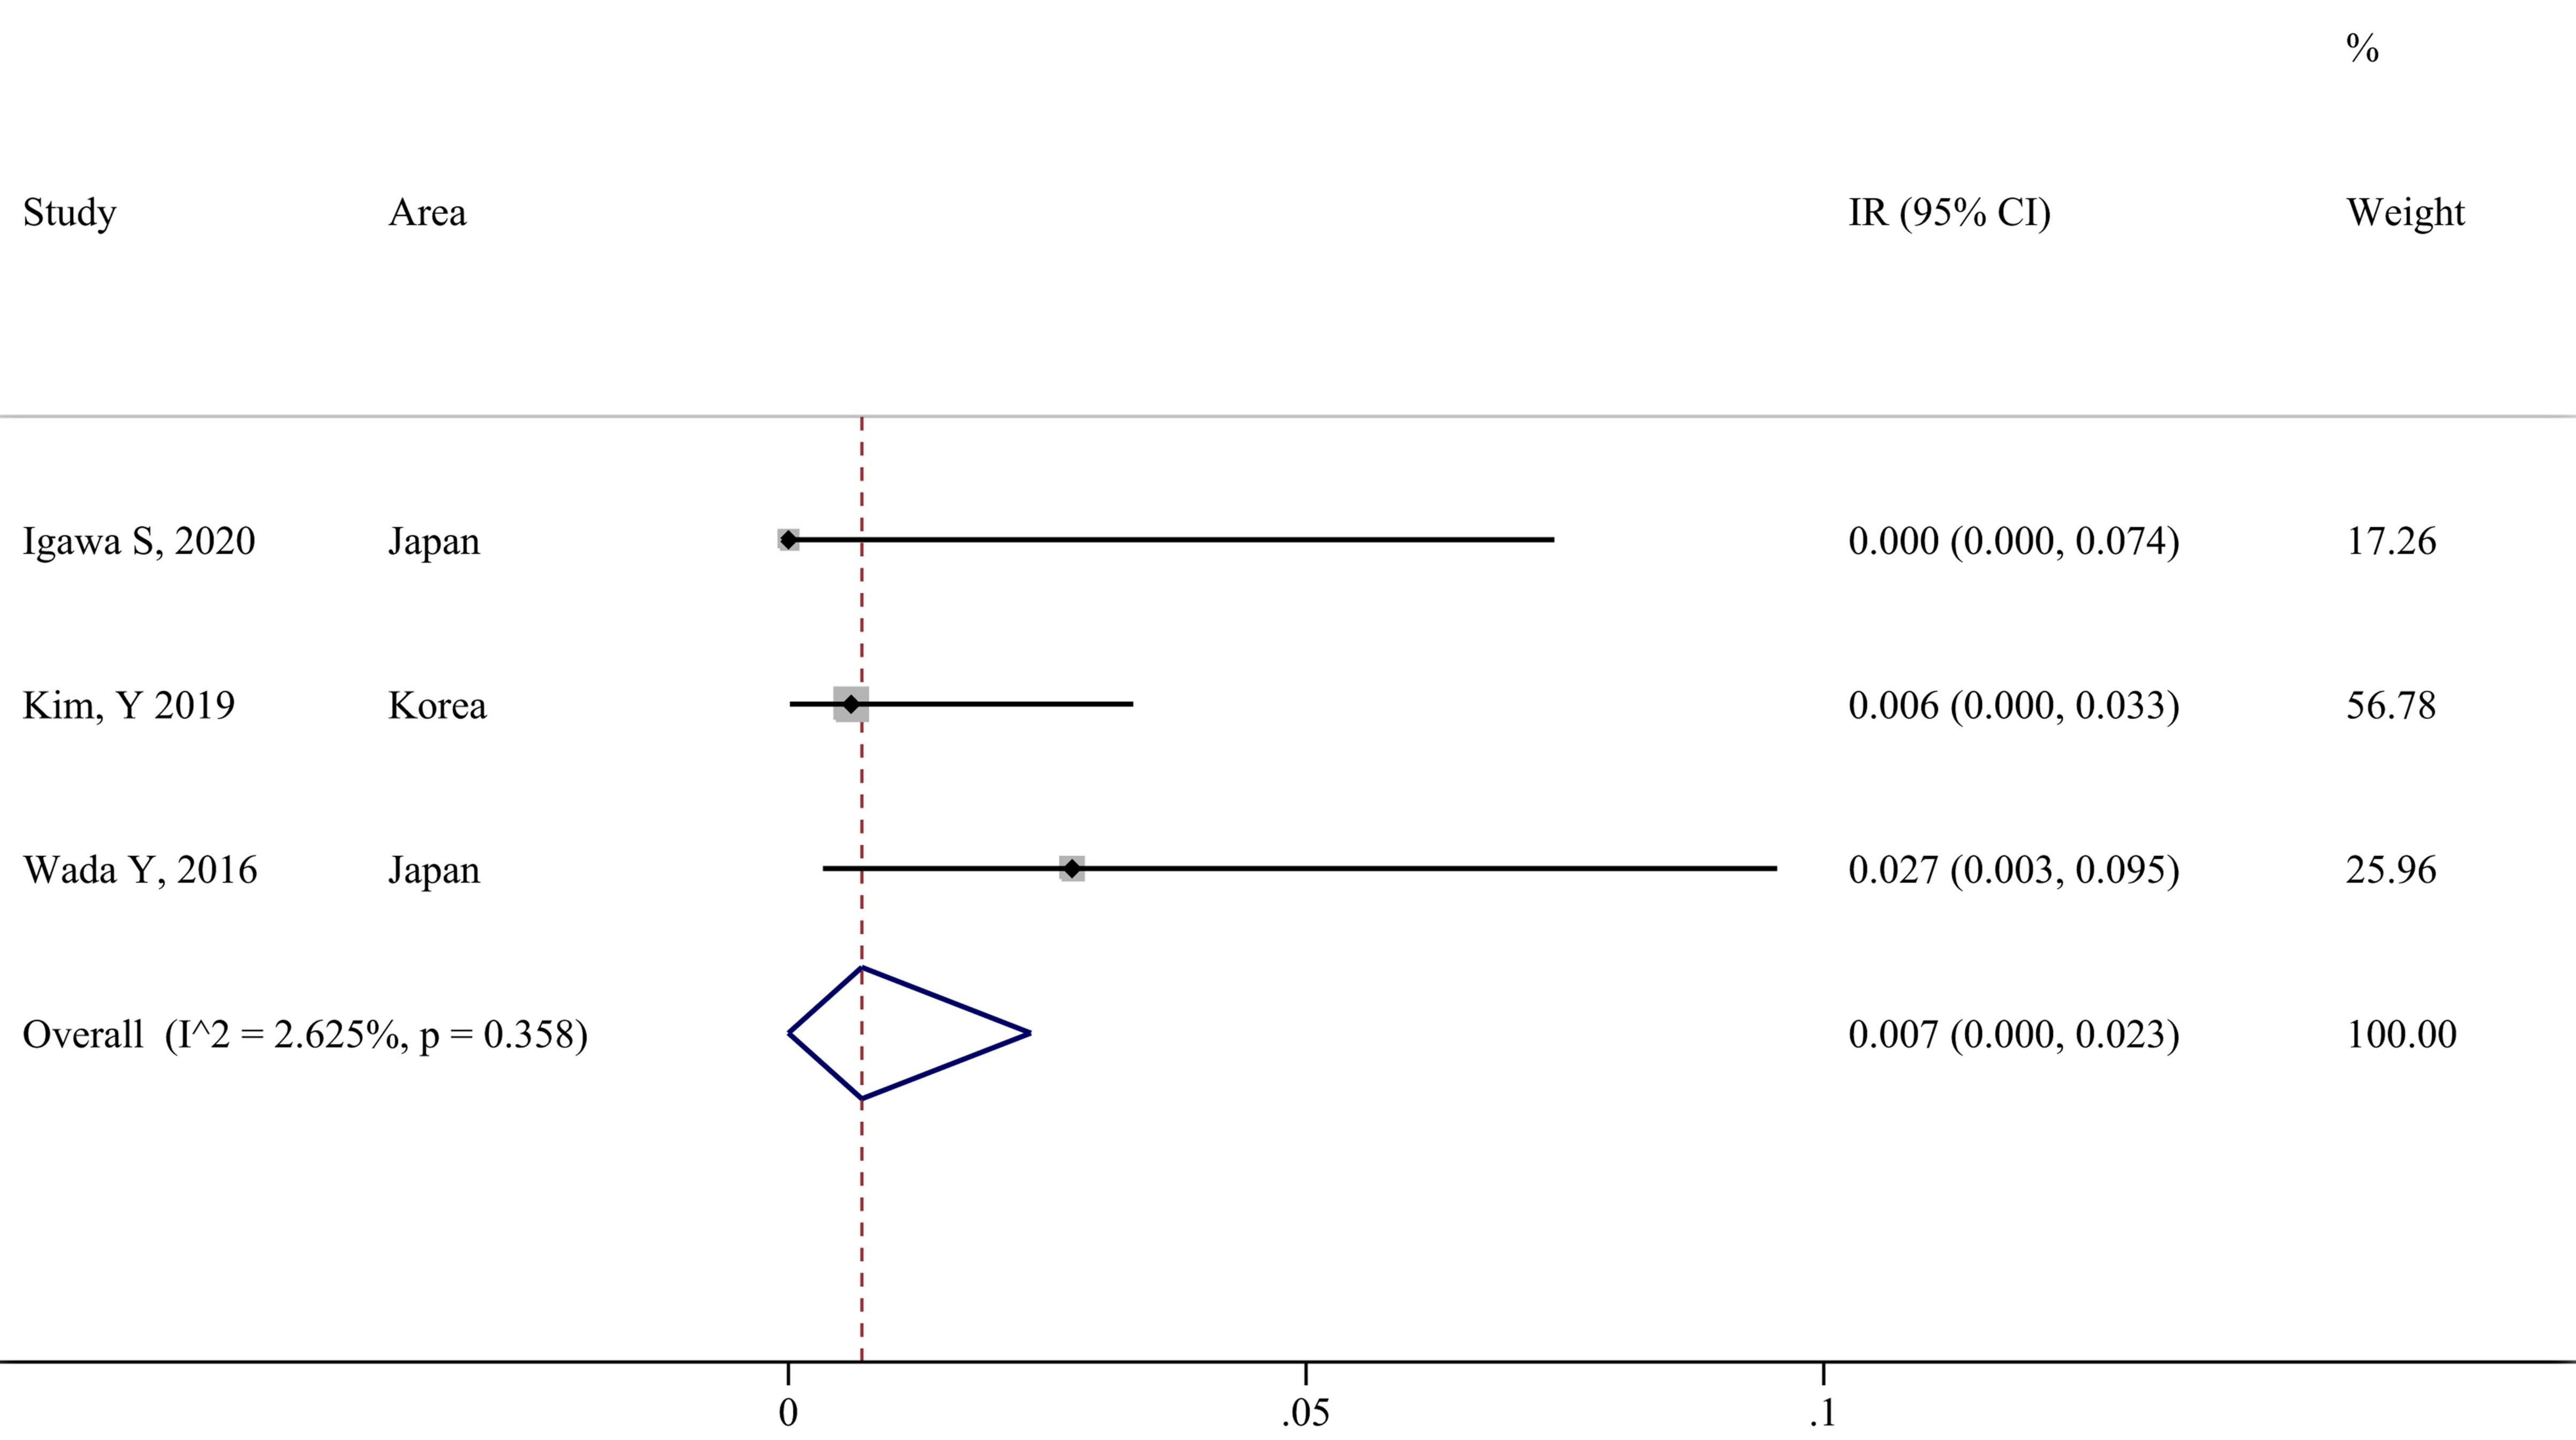

Supplement: f1 [file 8736288.f1.zip]
